# Supplementary material for: NiMoFe nanoparticles@MoO2 nano-pillar arrays as bifunctional electrodes for ultra-low-voltage overall water splitting
Source: Royal Society of Chemistry journal article supplement (doi:10.1039/d1ta09245f), 2021-12-30
Supplement: d1ta09245f1.pdf [file d1ta09245f1.pdf]

## Supporting Information

### **NiMoFe nanoparticles@MoO<sub>2</sub> nano-pillar arrays as bifunctional electrodes for ultra-low-voltage overall water splitting**

Peng Liu,<sup>a</sup> Weisheng Pan,<sup>a</sup> Rui Yao,<sup>a</sup> Lihan Zhang,<sup>a</sup> Qianyuan Wu,<sup>b</sup> Feiyu Kang,<sup>a</sup> Hong Jin Fan,<sup>c</sup> Cheng Yang<sup>\*a</sup>

<sup>a</sup>Institute of Materials Research, Tsinghua Shenzhen International Graduate School, Tsinghua University, Shenzhen 518055, China

<sup>b</sup>Institute of Environment Ecology, Tsinghua Shenzhen International Graduate School, Tsinghua University, Shenzhen 518055, China

<sup>c</sup>School of Physical and Mathematical Sciences, Nanyang Technological University, Singapore 637371, Singapore

\*E-mail: yang.cheng@sz.tsinghua.edu.cn

### **Preparation of NiMo(Fe) NPs@MoO<sub>2</sub> NPAs and other multielement NPs@MoO<sub>2</sub> NPAs.**

The NiMoFe NPs@MoO<sub>2</sub> NPAs were fabricated by a two-step process. First, the precursors were prepared by a hydrothermal method. A commercial nickel foam (1 × 3 cm<sup>2</sup>, thickness: 1.5 mm, bulk density: 0.19 g cm<sup>-3</sup>) was selected as the substrate. Before hydrothermal reaction, the nickel foam was first sonicated in ethanol and 5.0 M HCl solution for 5 min to remove the organic impurities and NiO<sub>x</sub> layer on the surface, respectively, rinsed subsequently with deionized water (DI water) and then dried in air. A piece of NF and 15 mL aqueous solutions containing Ni(NO<sub>3</sub>)<sub>2</sub> (6H<sub>2</sub>O) (0.233 g), (NH<sub>4</sub>)<sub>6</sub>Mo<sub>7</sub>O<sub>24</sub> (0.233 g) and FeCl<sub>2</sub> (0~0.1 g) were put into a stainless reactor which was heated to 150 °C for a 6-hour hydrothermal reaction. All solutions in the experiments were prepared with analytical grade chemicals and DI water. FeCl<sub>2</sub> used for 2-5# sample were 0.01, 0.025, 0.05 and 0.1g, respectively. Second, the as-synthesized precursors were dried in the air and annealed in the H<sub>2</sub>/Ar (v/v, 5/95) atmosphere at 500 °C for 2 h to obtain the NiMo(Fe) NPs@MoO<sub>2</sub> NPAs. The average mass loading of the as-obtained Ni<sub>x</sub>Fe<sub>1-x</sub>-NCAs was about 35-40 mg cm<sup>-2</sup>. The NiMoCo, NiMoRu, CoMoFe and

NiMoCoFe NPs@MoO<sub>2</sub> NPAs were prepared by the same process as preparing the NiMoFe NPs@MoO<sub>2</sub> except adopting a certain amount of RuCl<sub>3</sub> and Co(NO<sub>3</sub>)<sub>2</sub> (6H<sub>2</sub>O). The pure MoO<sub>2</sub> nano pillar arrays on NF were prepared by etching the NiMo nanoparticles away from the NiMo NPs@MoO<sub>2</sub> NPAs using 3M HCl solution.

**Fabrication of Pt/C-NF and IrO<sub>2</sub>-NF electrodes.** To prepare the Pt/C-NF electrodes, 20 mg commercial Pt/C, 100 μL Nafion, 100 μL ethanol and 500 μL deionized water were ultrasonicated for 20 min to obtain a homogeneous dispersion. Then, a piece of clean nickel foam was dipped into the dispersion, which was then dried in the air at 60 °C for 4 h. The mass loading of Pt/C catalyst on nickel foam was controlled to be ~ 4 mg cm<sup>-2</sup>. To prepare the IrO<sub>2</sub>-NF electrodes, 80 mg IrO<sub>2</sub>, 200 μL Nafion, 500 μL isopropanol and 400 μL deionized water were ultrasonicated for 30 min to obtain a homogeneous dispersion. Then, a piece of clean nickel foam was dipped into the dispersion, which was then dried in the air at 60 °C for 4 h. The mass loading of the IrO<sub>2</sub> catalyst on nickel foam was controlled to be ~ 16 mg cm<sup>-2</sup>.

**Materials characterizations.** The micromorphology and energy dispersive X-Ray spectroscopy (EDS) of catalysts was characterized by field emission scanning electron microscopy (FE-SEM, SAPHIRE SUPRA 55). The high-resolution transmission electron microscope (HRTEM) images and Energy Dispersive Spectrometry (EDS) of catalysts were obtained by JEOL ARM 200F and JEOL JEM-3200FS, Japan. Crystallographic information was obtained with X-ray diffraction (Bruker DSRINT2000/PC, Germany) using Cu K $\alpha$  radiation with  $\lambda=1.5418$  Å (at a diffraction angle ranging from 10° to 80° at a scan rate of 5°/min). Raman spectra of the materials were obtained with a spectrometer (Lab RAM HR spectrometer, Horiba, Japan) operating with argon-ion laser (532 nm) as the excitation light source. X-ray photoelectron spectra (XPS) were measured with Al-K $\alpha$  radiation (50 W, 15 kV) (ESCALABSB 250 Xi). The shift of binding energy due to relative surface charging was corrected using the C 1 s level at 284.6 eV as an internal standard. The contact angles of water

and gas bubbles under electrolyte were tested by the method of captive bubble using the Kruss DSA30 system. Composition analyses of Ni, Fe and Mo contained in the nanoparticles were obtained from the SPECTRO ARCOS II MV inductively coupled plasma optical emission spectrometer (ICP-OES, Germany). The powder of the sample was soaked in the concentrated hydrochloric acid for 3 minutes to ensure enough dissolution of metallic nanoparticles and avoid the dissolution of the MoO<sub>2</sub> substrate.

**Electrochemical measurements.** Electrochemical measurements were conducted with the electrochemical working station (CHI 660E) in a three-electrode electrochemical setup. A 1 M KOH solution was used as the electrolyte, and a Hg/HgO electrode (in 1 M KOH) and graphite rod (with a diameter of 8 mm) were used as a reference and counter electrodes, respectively. The as-prepared electrodes supported on Ni foam were utilized as the working electrode. The working area was tailored to 0.4 cm<sup>2</sup>. To convert the measured potential versus the Hg/HgO electrode into the potential versus reversible hydrogen electrode (RHE), the Hg/HgO reference electrode was calibrated using RHE in 1 M KOH solution. Testing equipment was shown in Figure S9a. The Pt and graphite were employed as working electrode (WE) and counter electrode (CE) in 1 M KOH electrolyte. The electrolyte was saturated by hydrogen via bubbling hydrogen in the bottom of the electrolyser firstly. Then continuous H<sub>2</sub> was blown over the surface of the electrolyte to keep a H<sub>2</sub>-saturated environment when collecting data. To perform the calibration, a series of CV measurements were carried out to determine the zero current potential (the interconversion between the hydrogen oxidation and hydrogen evolution reaction). The scan rate of the CV measurement is set as low as 1 mV S<sup>-1</sup> to avoid the possible contribution of capacitive current. As shown in Figure S9b, the result shows that the potential of zero net current can be estimated at -0.924 V versus the Hg/HgO electrode, and the relation between the Hg/HgO reference and RHE in 1 M KOH solution can thus be established using formula  $E_{\text{RHE}} = E_{\text{Hg/HgO}} + 0.924 \text{ V}$  in 1 M KOH solution.

iR compensation was performed by the automatic current interrupt method with a value of 93% x Ru for OER and 95% x Ru for HER through the CHI 660E working station. For OER, in order to provide reliable electrochemical data and avoid overlap between Ni<sup>2+</sup>/Ni<sup>3+</sup> oxidation and OER, polarization curves were recorded from high initial potentials to low final potentials with a 5 mV s<sup>-1</sup> scan rate. Tafel slopes were calculated using the polarization curves by plotting overpotential against log (current density). Chronopotentiometry measurements were performed to evaluate the long-term stability. ECSA was determined by measuring the capacitive current associated with double-layer charging from the scan-rate dependence of CVs. For this, the potential window of CVs was 0.1-0.2 V versus Hg/HgO. The scan rates were 100, 200, 300, 400 and 500 mV s<sup>-1</sup>. The double-layer capacitance (C<sub>dl</sub>) was estimated by plotting the  $\Delta j = (j_a - j_c)$  at 0.15 V versus Hg/HgO against the scan rate. The linear slope is twice of the double layer capacity. The ECSA values were calculated from the measured double layer capacitance divided by the specific capacitance of an atomically smooth material (C<sub>dl</sub><sup>'</sup>, ~40  $\mu\text{F cm}^{-2}$ ):  $\text{ECSA} = C_{\text{dl}} \div C_{\text{dl}}' \times S$ , where S is the actual surface area of the electrode. The electrochemical impedance spectroscopies (EIS) measurement was conducted at 1.53 V (vs. RHE) for OER and -0.1 V (vs. RHE) for HER, in the frequency range from 100 kHz to 0.01 Hz with an amplitude of 5 mV. The tests of full water splitting were conducted by a two-electrode electrochemical setup by combining the counter electrode and reference electrode with 95% iR compensation. The R<sub>u</sub> used for iR compensation for the chronopotentiometry test were obtained from the EIS tests at 0 V vs. Hg/HgO.

**Numerical simulation methods.** All the spin-polarized density functional theory (DFT) calculations were performed by using Vienna Ab-initio Simulation Package<sup>[1]</sup> (VASP) under the Projected Augmented Wave<sup>[2]</sup> (PAW) method. The revised Perdew-Burke-Ernzerhof (RPBE) functional was used to describe the exchange and correlation effects.<sup>[3]</sup> In all the

calculations, the cutoff energy was set to be 450 eV. The (111) surface was simulated to represent the catalytic interface. The slab model was constructed by six atomic layer with 4×4 supercell. The Monkhorst-Pack grids<sup>[4]</sup> were set to be 2×2×1 for computing the surface calculations. A 15 Å vacuum layer was applied in z-direction of the slab models, preventing the slabs from vertical interactions.

In alkaline conditions, HER could occur via the following elementary steps:

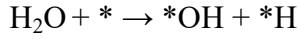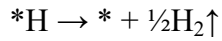

where \* denotes the active sites on the catalyst surface. The free energy of the adsorbed hydrogen is defined as:

$$\Delta G_{\text{H}^*} = \Delta E_{\text{H}} + \Delta E_{\text{ZPE}} - T\Delta S_{\text{H}}$$

where  $\Delta E_{\text{H}}$  is the hydrogen binding energy,  $\Delta E_{\text{ZPE}}$  is the zero point energy difference between adsorbed hydrogen and gaseous hydrogen, and  $T\Delta S$  is the corresponding entropy difference between these two states.

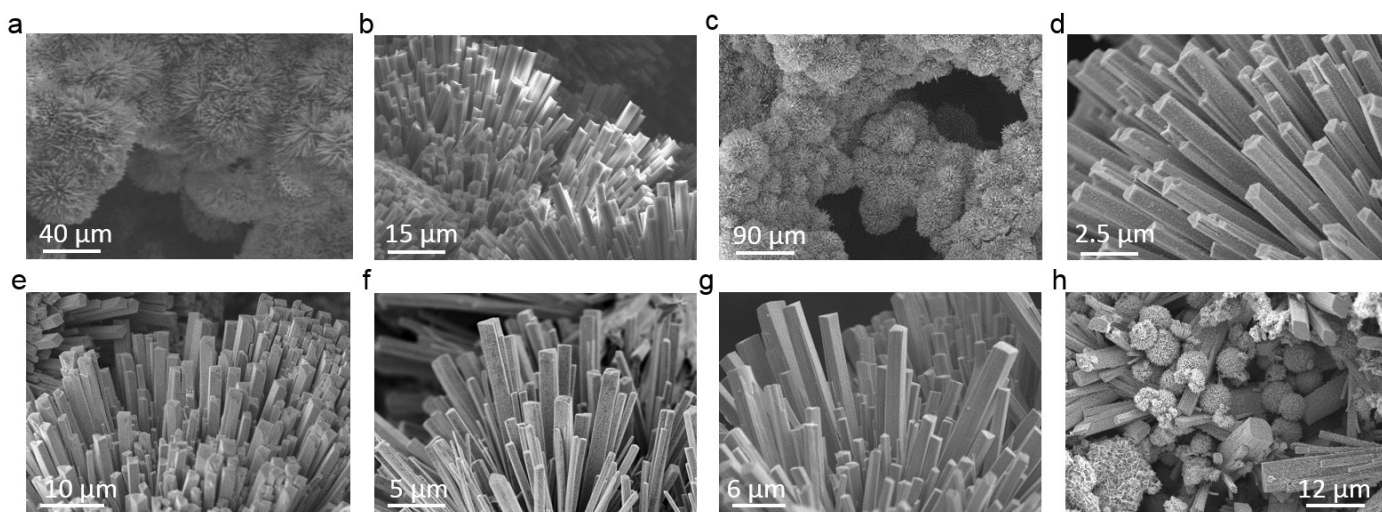

**Figure S1.** SEM images of the precursor (a-b) and a corresponding annealed sample (c-d) of 1# NiMoFe NPs@MoO<sub>2</sub> NPAs. SEM images of annealed samples of (e) 2#, (f) 3#, (g) 4# and (h) 5# NiMoFe NPs@MoO<sub>2</sub> NPAs are also provided.

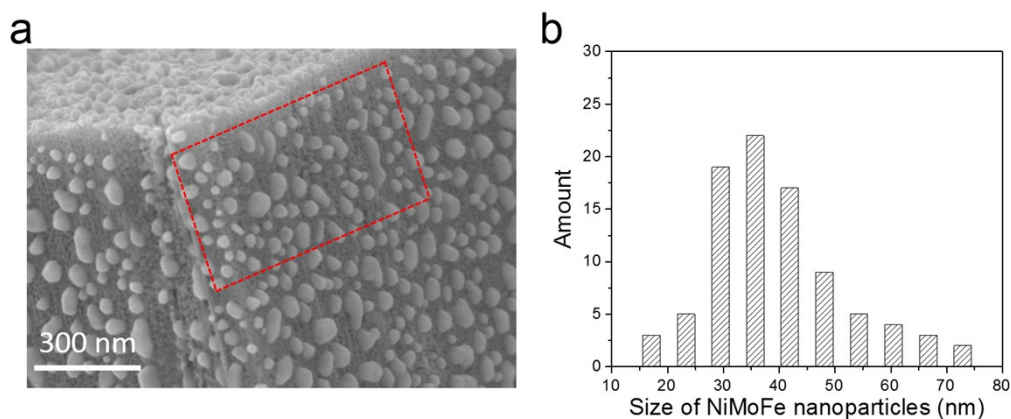

**Figure S2.** (a) SEM images of an annealed sample of 4# NiMoFe NPs@MoO<sub>2</sub> NPAs. (b) Size distribution of the nanoparticles on 4# sample measured from (a). The density of the nanoparticle is calculated from the area surrounded by a red parallelogram in (a).

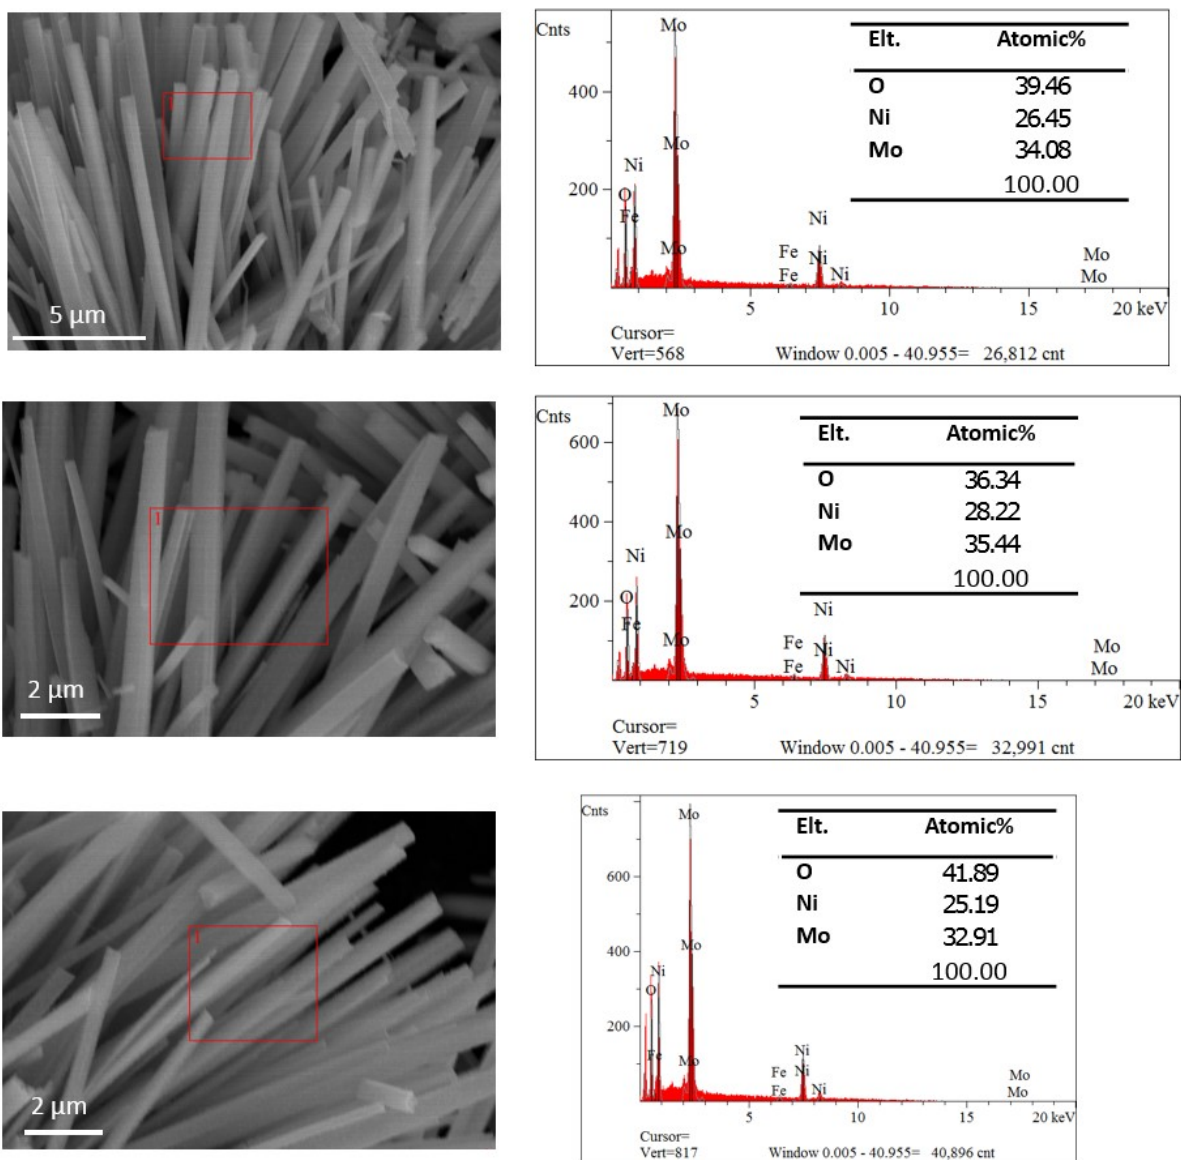

**Figure S3a.** SEM images and corresponding EDS quantitative analysis of 1# sample of NiMo NPs@MoO<sub>2</sub> NPAs.

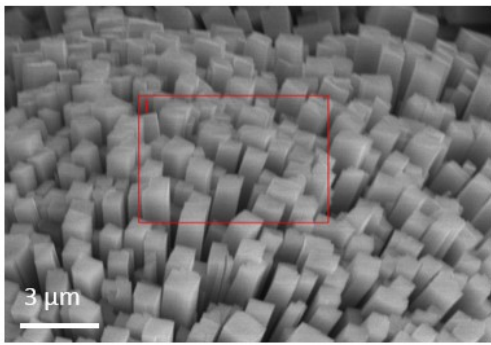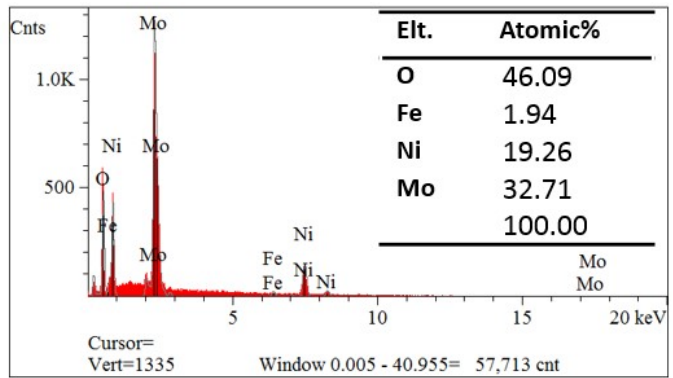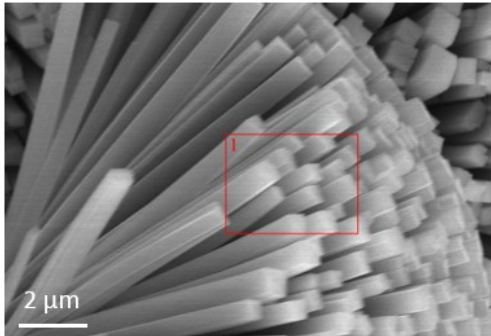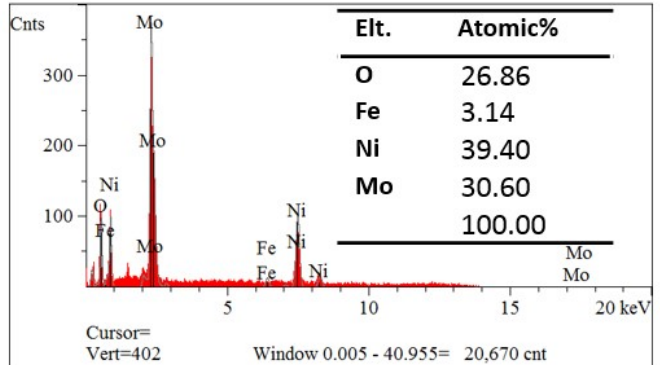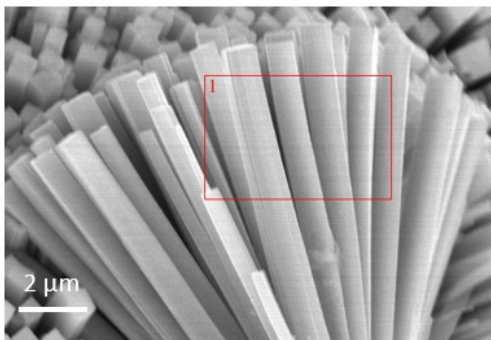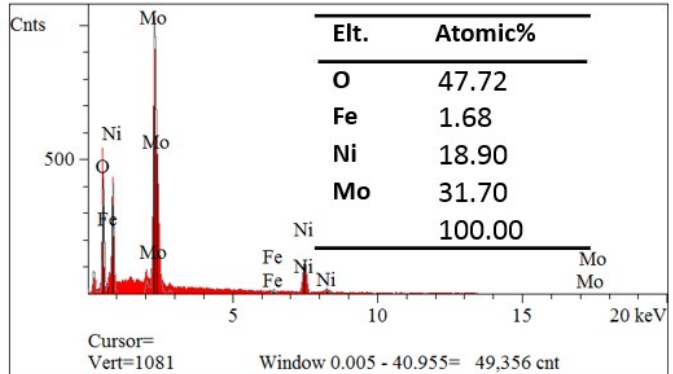

**Figure S3b.** SEM images and corresponding EDS quantitative analysis of 2# sample of NiMoFe NPs@MoO<sub>2</sub> NPAs.



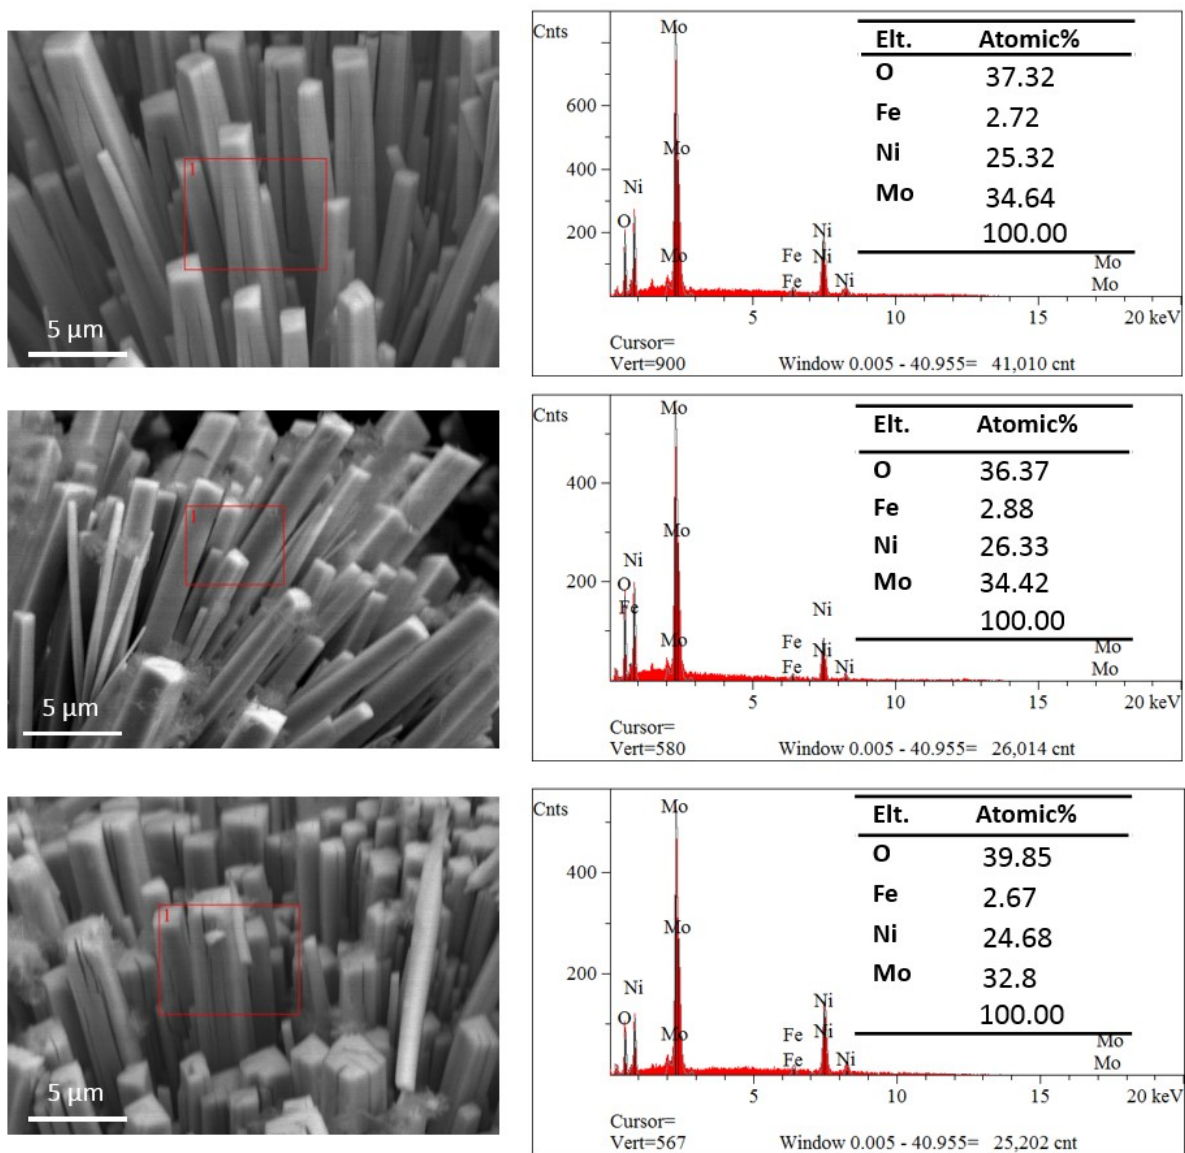

**Figure S3c.** SEM images and corresponding EDS quantitative analysis of 3# sample of NiMoFe NPs@MoO<sub>2</sub> NPAs.

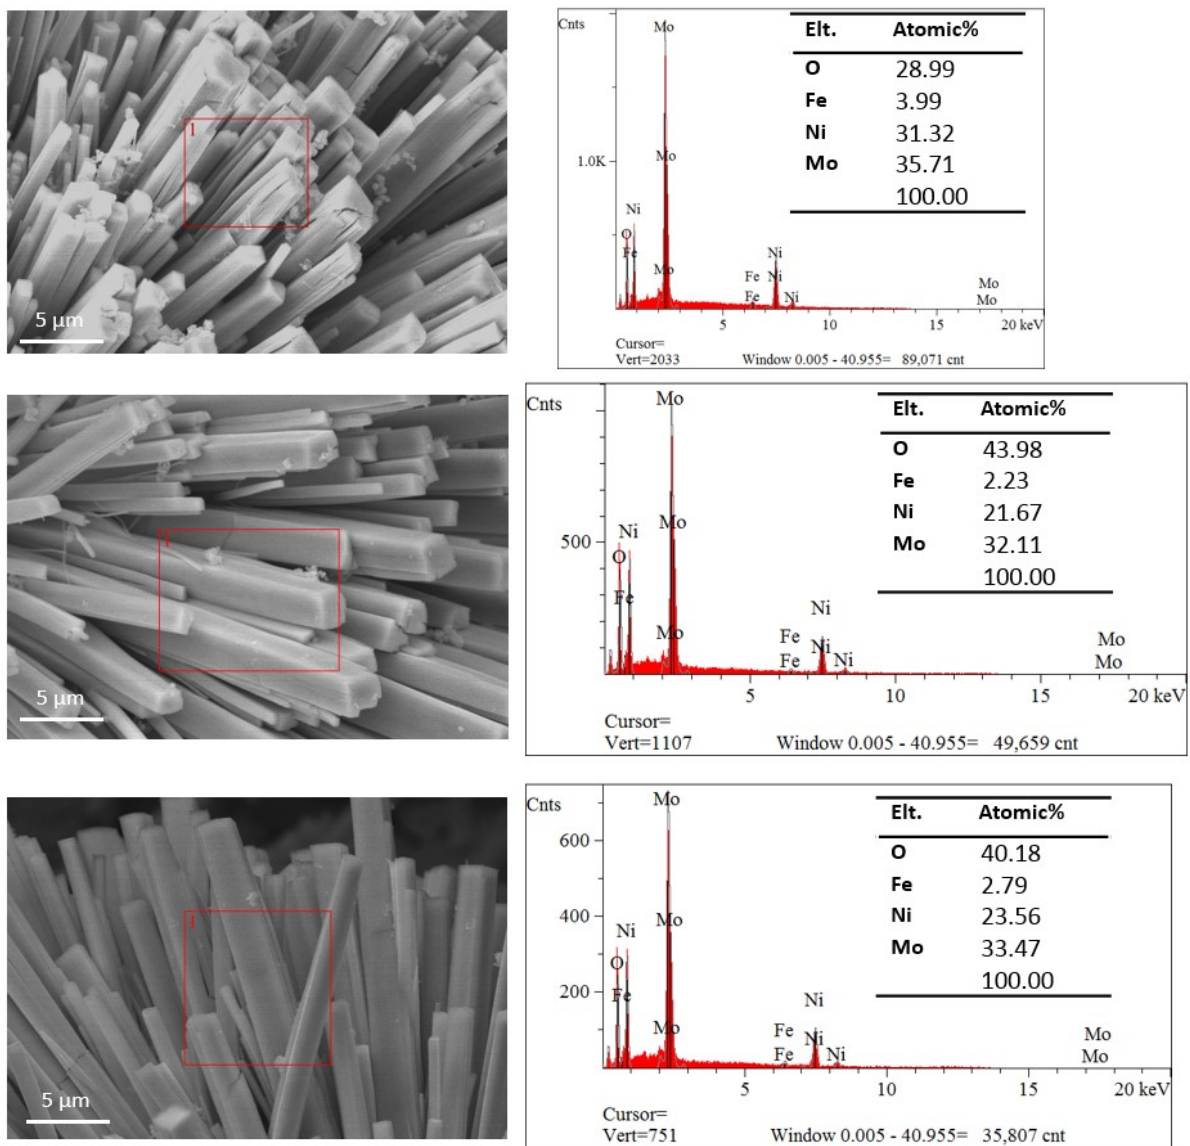

**Figure S3d.** SEM images and corresponding EDS quantitative analysis of 4# sample of NiMoFe NPs@MoO<sub>2</sub> NPAs.

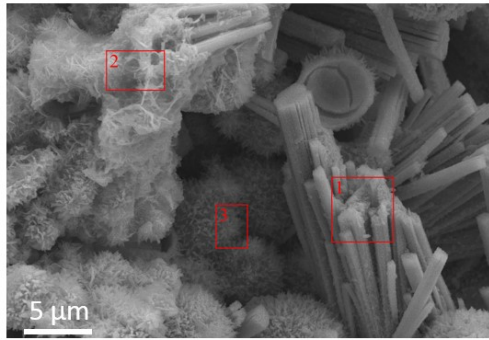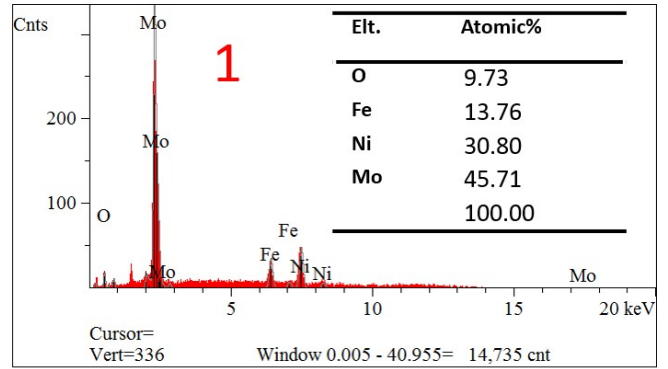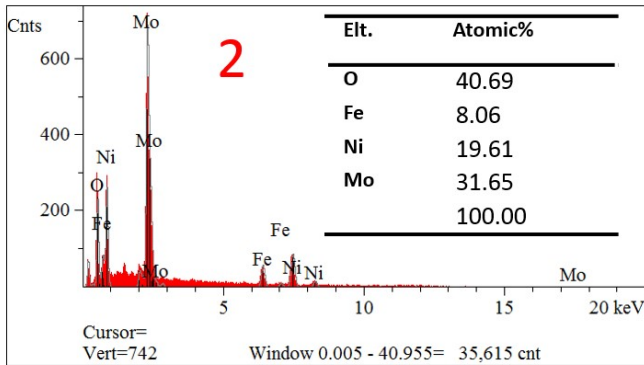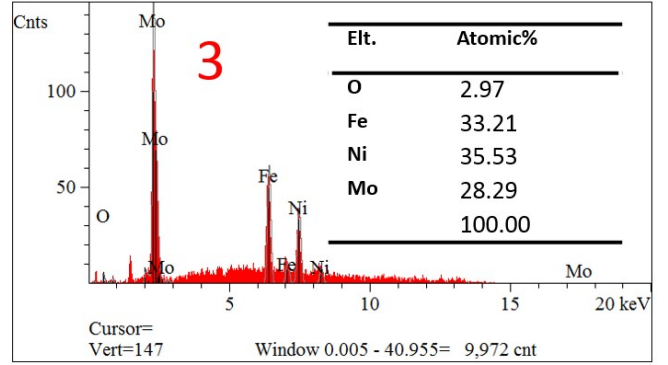

**Figure S3e.** SEM images and corresponding EDS quantitative analysis of 5# sample of NiMoFe NPs@MoO<sub>2</sub> NPAs.

**Table S1.** Summary of compositions (at%) of 1-5# sample of NiMo(Fe) NPs@MoO<sub>2</sub> NPAs from SEM EDS.

| Element | 1#   | 2#   | 3#   | 4#   | 5#   |
|---------|------|------|------|------|------|
| O       | 39.2 | 40.2 | 37.8 | 37.7 | 17.8 |
| Fe      | 0.0  | 2.3  | 2.8  | 3.0  | 18.3 |
| Ni      | 26.7 | 25.9 | 25.4 | 25.5 | 28.6 |
| Mo      | 34.1 | 31.7 | 34.0 | 33.8 | 35.2 |

**Table S2.** Summary of compositions (at%) of 1-5# NiMo(Fe) NPs@MoO<sub>2</sub> NPAs from ICP-OES.

| Element | 1#   | 2#   | 3#   | 4#   | 5#   |
|---------|------|------|------|------|------|
| Fe      | 0.0  | 0.1  | 1.8  | 3.9  | 14.9 |
| Mo      | 22.6 | 24.3 | 27.3 | 25.2 | 31.3 |
| Ni      | 77.4 | 75.6 | 70.9 | 70.9 | 53.8 |

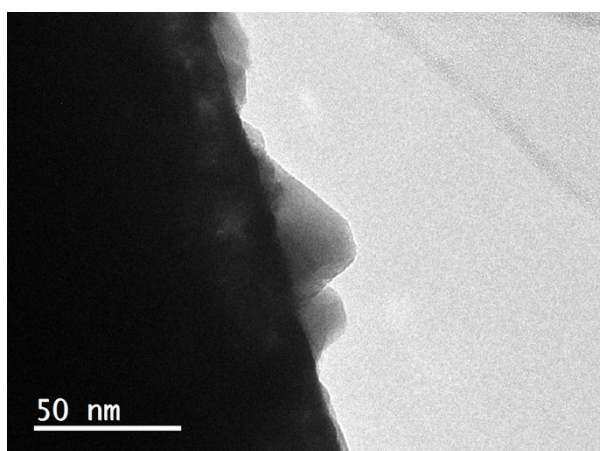

**Figure S4.** TEM image of the annealed 4# sample of NiMoFe NPs@MoO<sub>2</sub> NPAs.



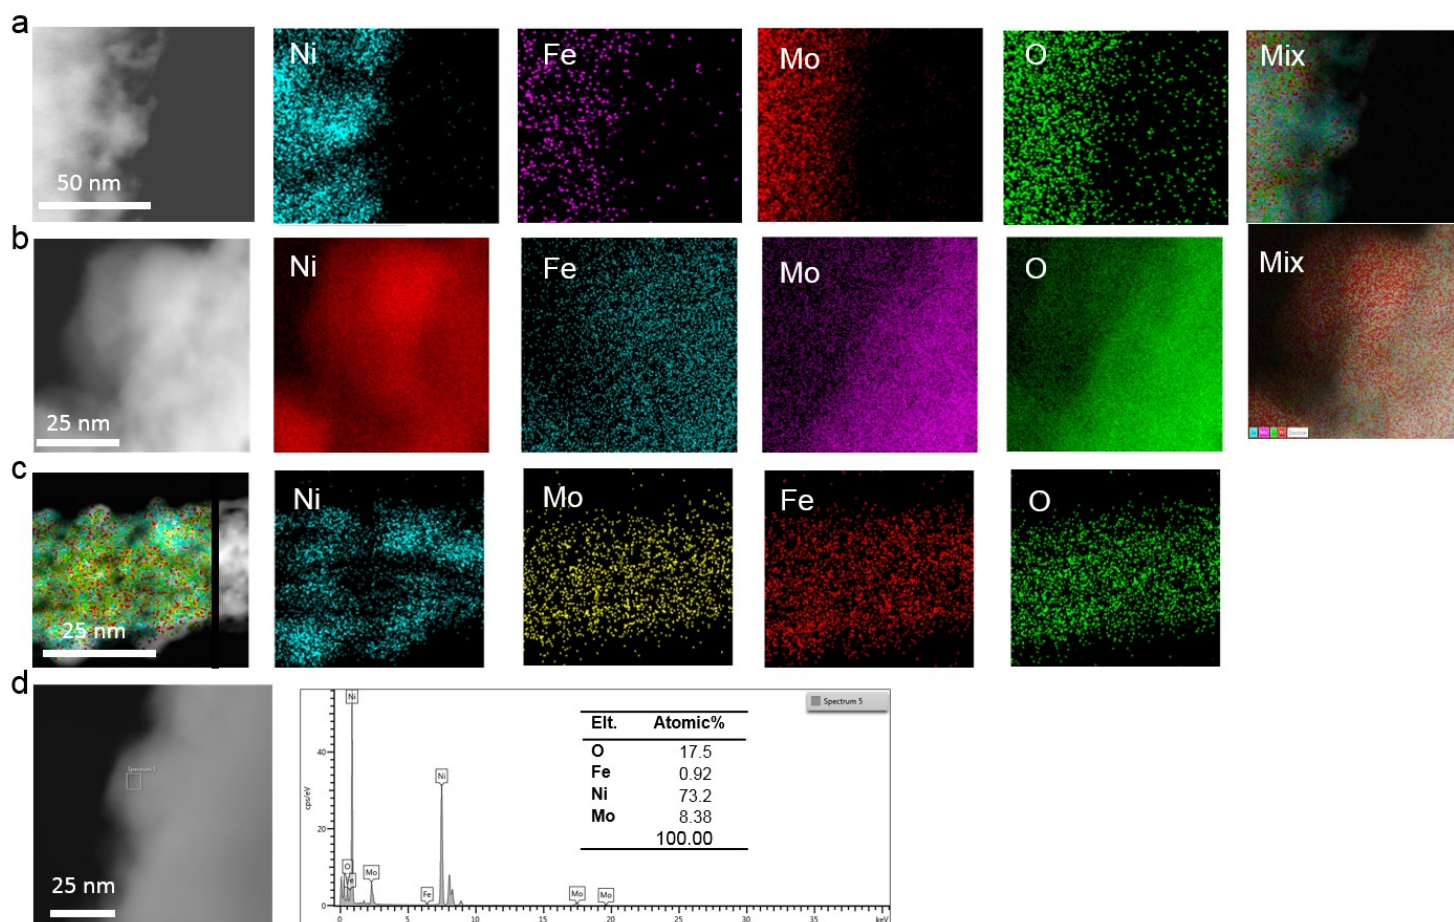

**Figure S5.** (a-c) TEM image of 4# NiMoFe NPs@MoO<sub>2</sub> NPAs and corresponding EDS mapping images of Ni, Fe, Mo, O and their mixture. (d) TEM selected area EDS quantitative analysis.

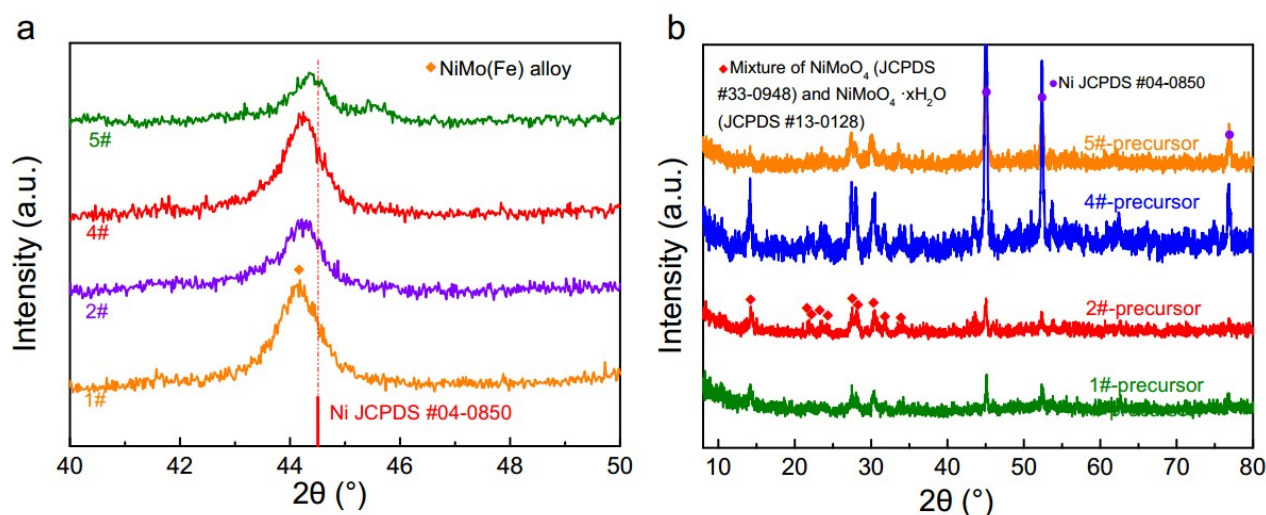

**Figure S6.** (a) Local magnification of XRD patterns of 1-2 and 4-5# NiMo(Fe) NPs@MoO<sub>2</sub> NPAs in Figure 2a. (b) XRD patterns of the precursors of 1-2 and 4-5# samples on NF.

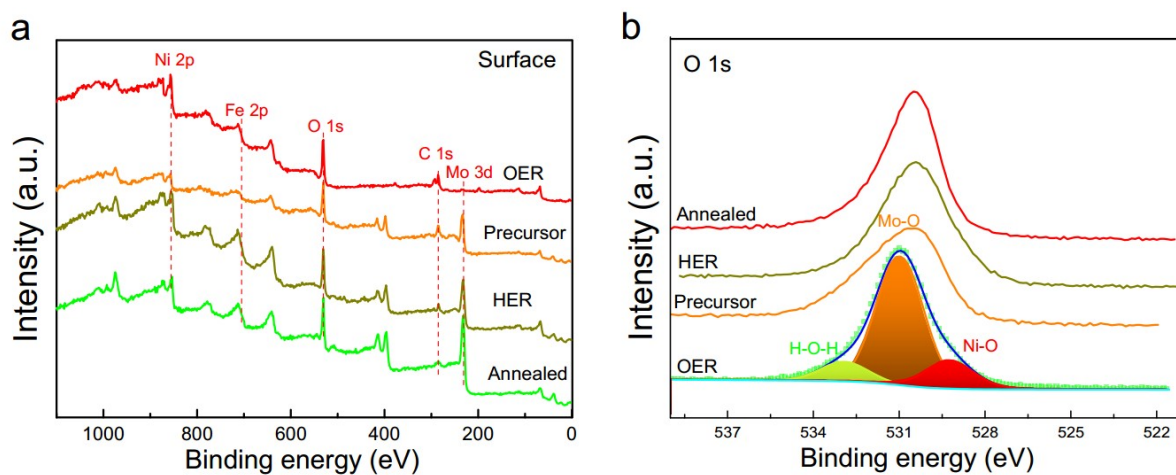

**Figure S7.** (a) Wide-scanning XPS spectra of as-prepared 4# NiMoFe NPs@MoO<sub>2</sub> NPAs and (b) O 1s fine spectrum of the samples after long-term OER tests.

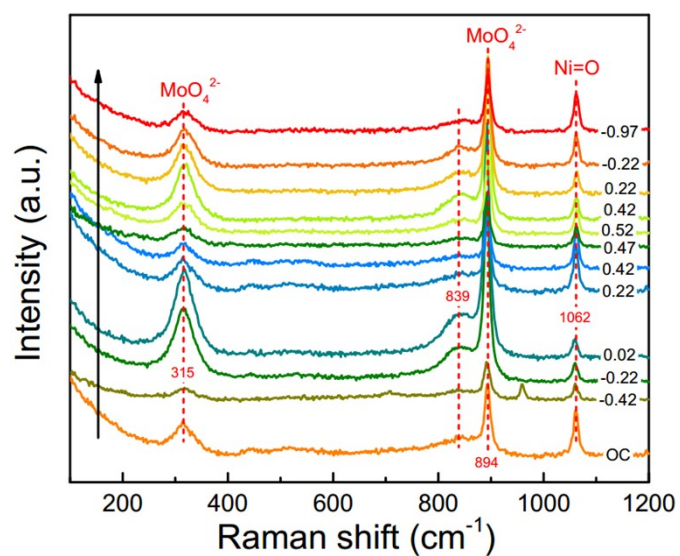

**Figure S8.** *in situ* Raman spectra of 4# NiMoFe NPs@MoO<sub>2</sub> NPAs precursor under different potentials.

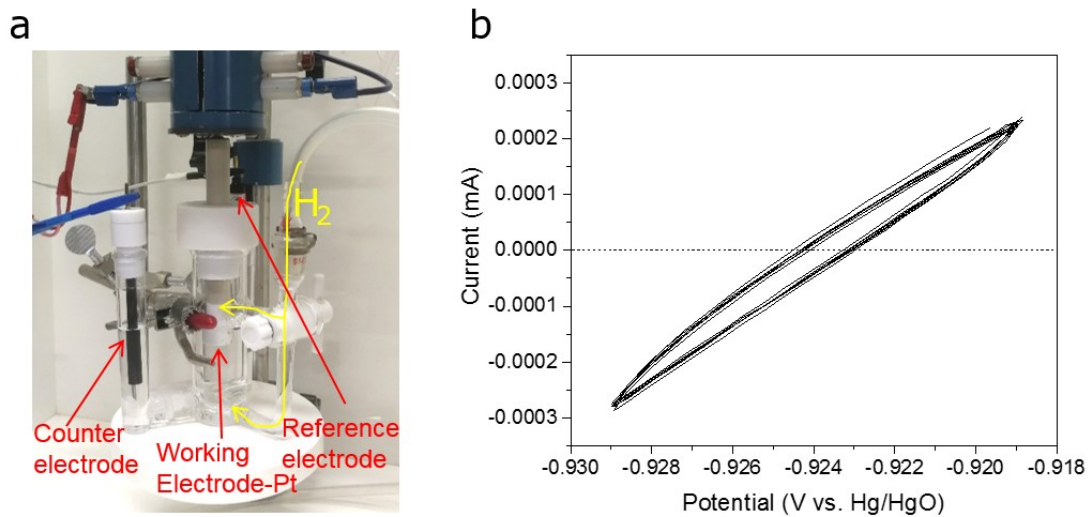

**Figure S9.** Calibration of Hg/HgO reference electrode with respect to RHE. (a) Testing equipment. (b) CV curves of Pt electrode under H<sub>2</sub>-saturated 1M KOH electrolyte.



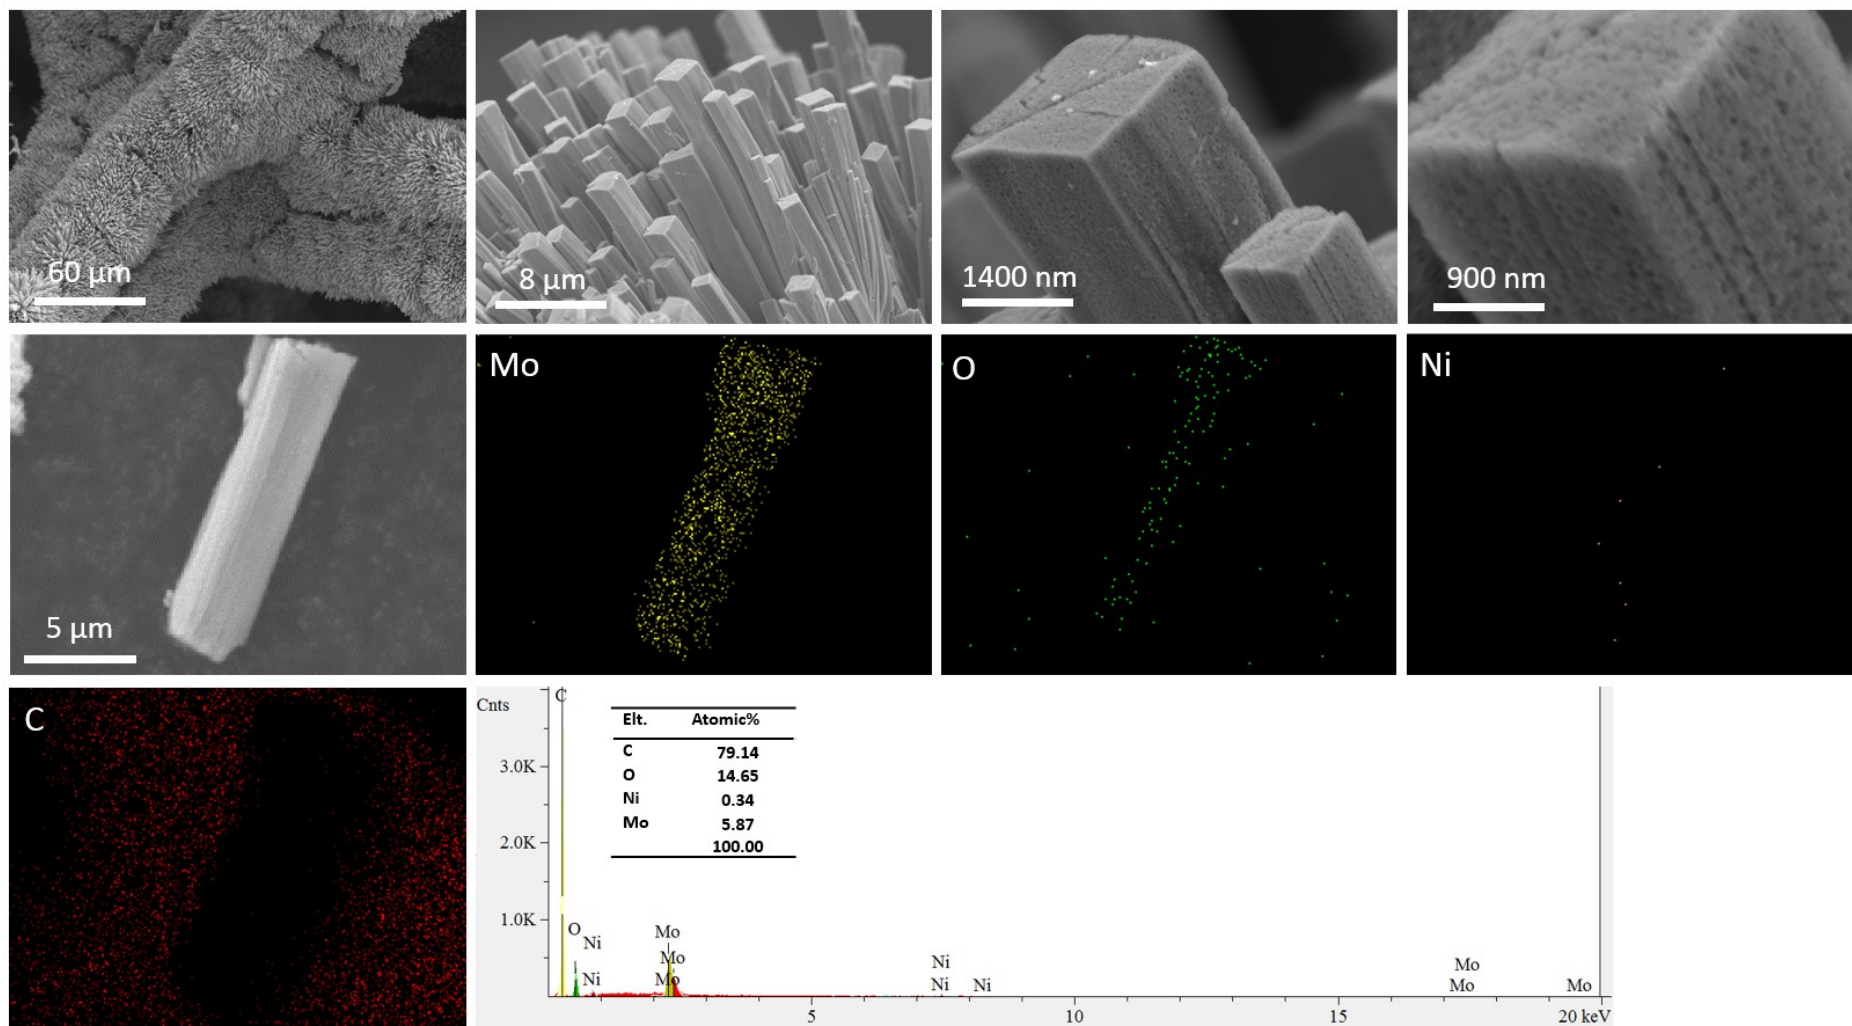

**Figure S10.** SEM images and corresponding EDS analysis of pure MoO<sub>2</sub> nano pillar arrays (acid etched 1# sample of NiMo NPs@MoO<sub>2</sub> NPAs).



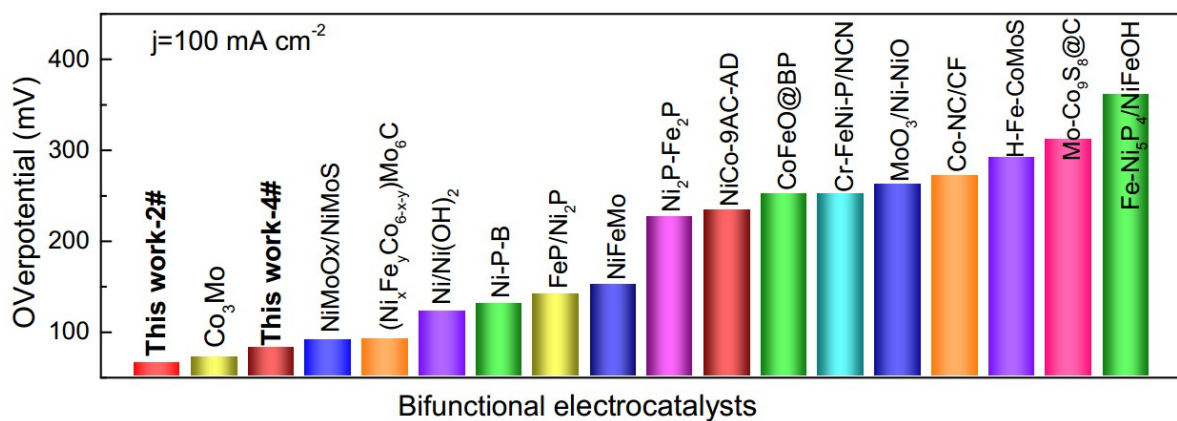

**Figure S11.** Comparison of the overpotential at  $100 \text{ mA cm}^{-2}$  for NiMoFe NPs@MoO<sub>2</sub> NPAs with recently reported bifunctional alkaline water splitting catalysts, details can be seen in Table S4.

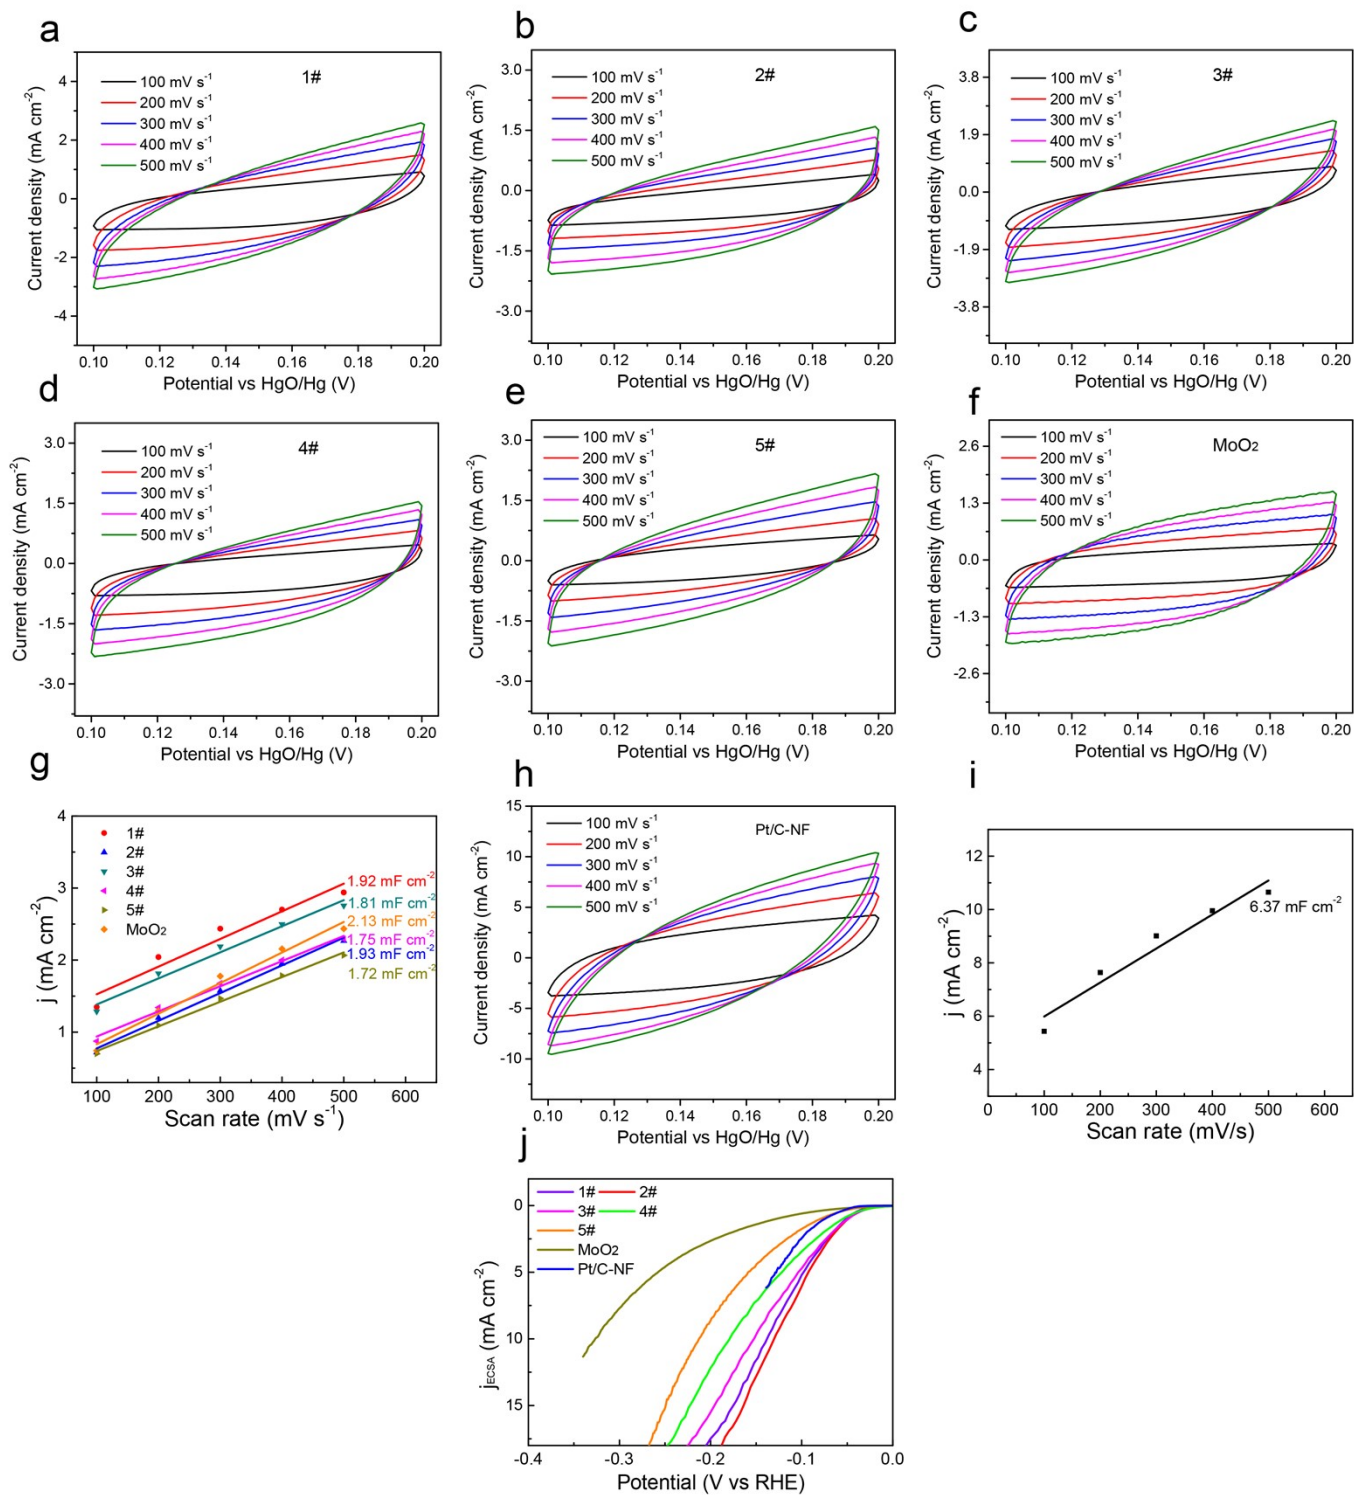

**Figure S12.** CV curves at different scan rates within a non-Faraday capacitive potential range (a-f) and  $C_{dl}$  calculations (g) of 1-5# NiMo(Fe) NPs@MoO<sub>2</sub> NPAs and MoO<sub>2</sub> nano pillar arrays. CV curves at different scan rates within a non-Faraday capacitive potential range (h) and  $C_{dl}$  calculations (i) of Pt/C-NF. (j) Electrochemical active surface area (ECSA) normalized HER polarization curves of 1-5# NiMo(Fe) NPs@MoO<sub>2</sub> NPAs, MoO<sub>2</sub> nano pillar arrays and Pt/C-NF.

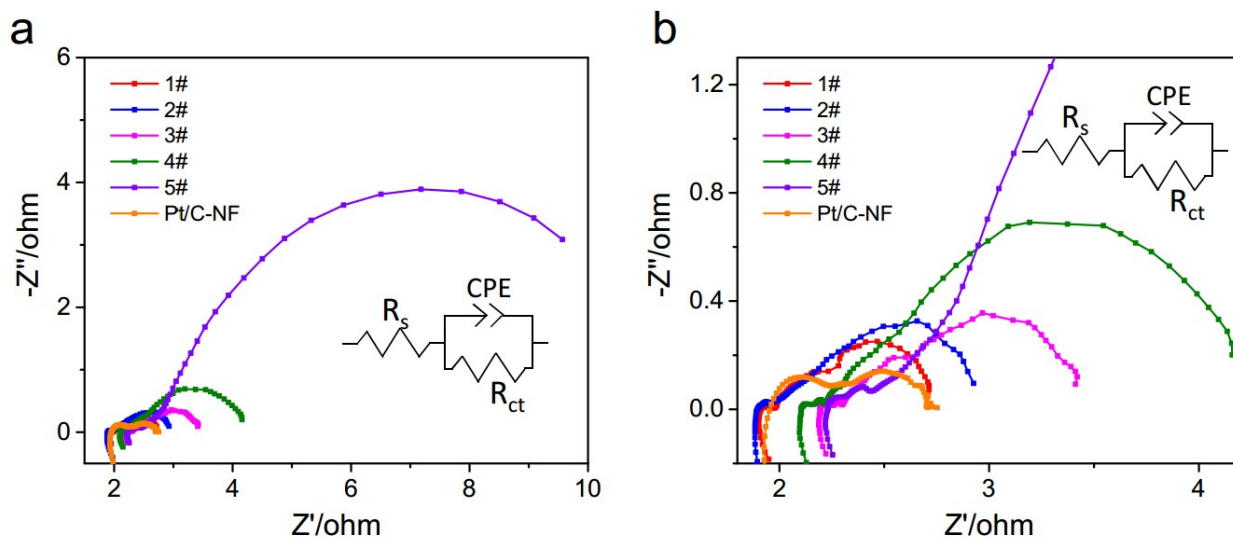

**Figure S13.** (a) Electrochemical impedance spectroscopy (EIS) of 1-5# NiMoFe NPs@MoO<sub>2</sub> NPAs and Pt/C-NF tested at the overpotential of HER of 100 mV with the same electrode area. (b) Magnification of Figure (a).

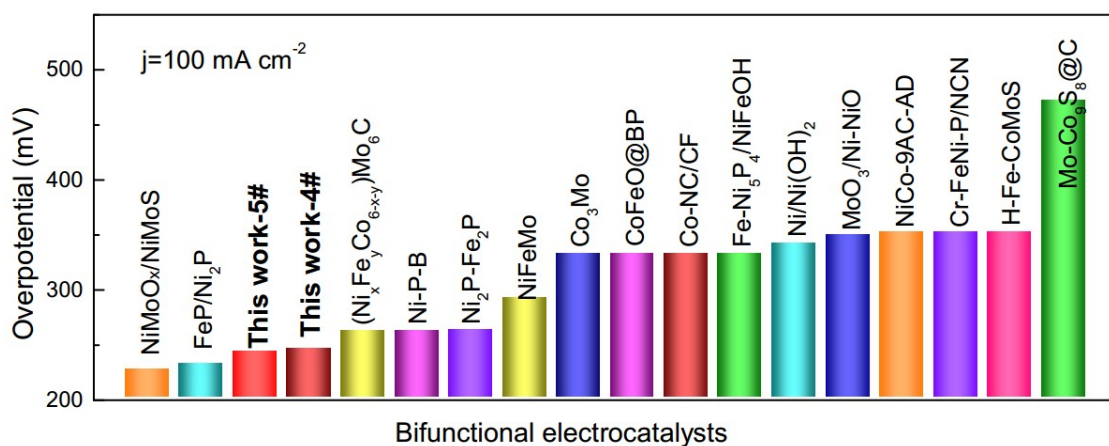

**Figure S14.** Comparison of the OER overpotential of NiMoFe NPs@MoO<sub>2</sub> NPAs at 100 mA cm<sup>-2</sup> with recently reported bifunctional alkaline water-splitting catalysts, details can be seen in Table S4.

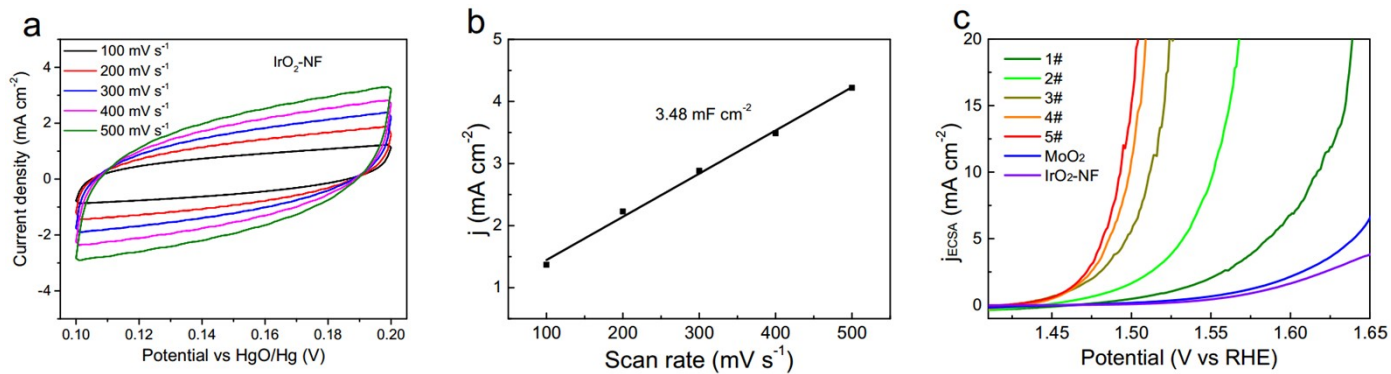

**Figure S15.** (a) CV curves of IrO<sub>2</sub>-NF at different scan rates within a non-Faraday capacitive potential range. (b) C<sub>dl</sub> calculations of IrO<sub>2</sub>-NF. (c) Electrochemical active surface area (ECSA) normalized OER polarization curves of 1-5# NiMoFe NPs@MoO<sub>2</sub> NPAs and IrO<sub>2</sub>-NF.

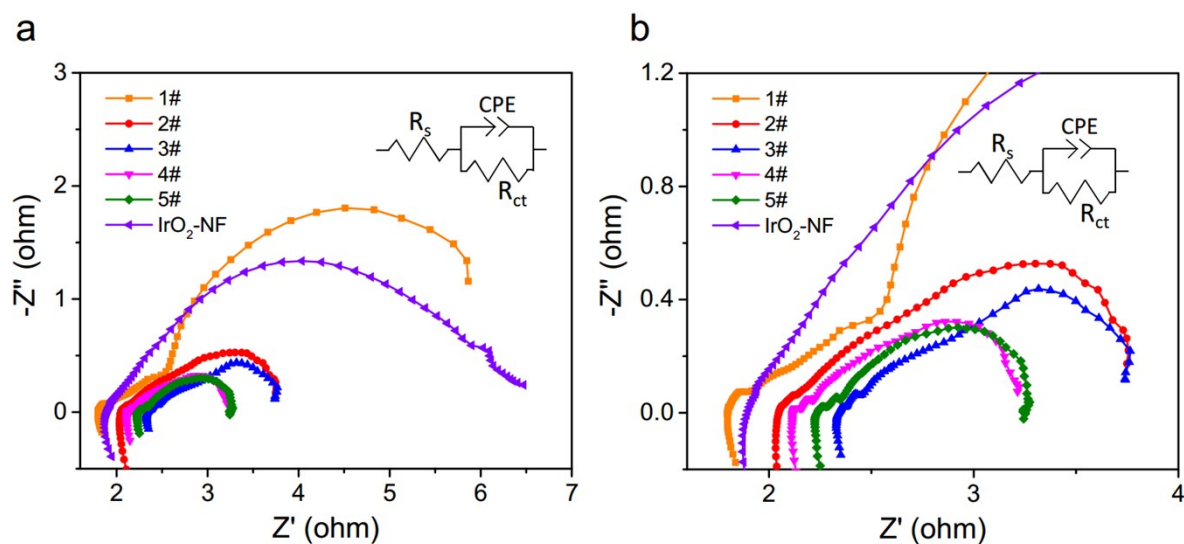

**Figure S16.** (a) Electrochemical impedance spectroscopy (EIS) of 1-5# NiMoFe NPs@MoO<sub>2</sub> NPAs and IrO<sub>2</sub>-NF tested at the overpotential of HER of 100 mV with the same electrode area. (b) Magnification of (a).

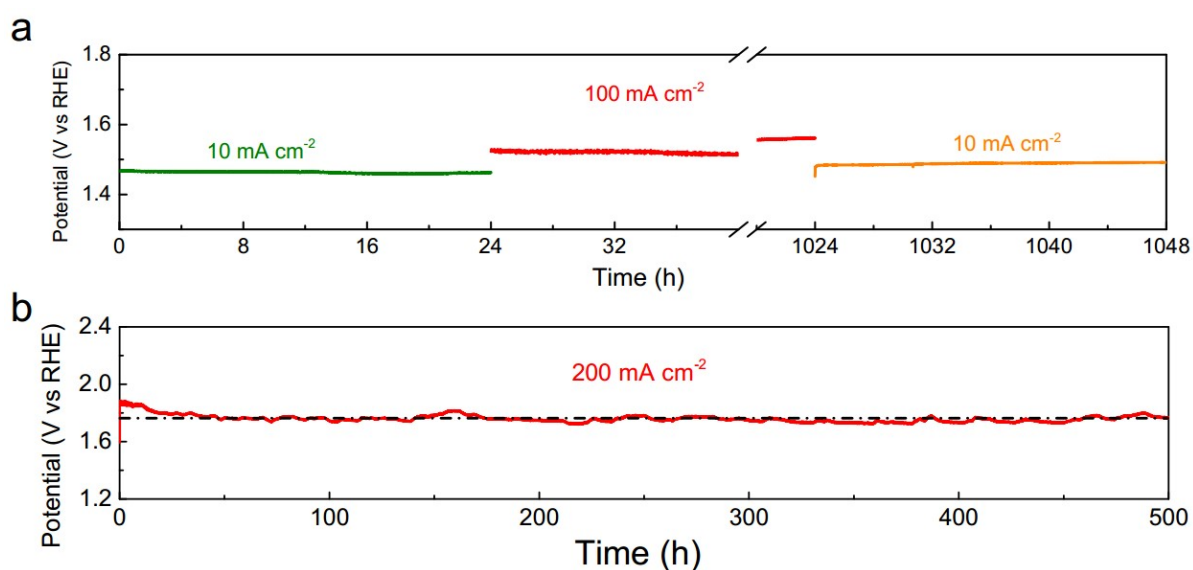

**Figure S17.** Chronopotential test of 4#||4# NiMoFe NPs@MoO<sub>2</sub> NPAs cell at (a) 10, 100, 10 mA cm<sup>-2</sup> and (b) 200 mA cm<sup>-2</sup> in 1.0 M KOH solution at room temperature with iR compensation.

**Table S3.** HER and OER electrocatalytic performance comparisons among recently reported advanced bifunctional alkaline water-splitting catalysts.  $\eta_{10}$ ,  $\eta_{100}$  and  $\eta_{200}$  correspond to the overpotentials at the geometric current densities of 10, 100 and 200 mA cm<sup>-2</sup>, respectively.

| Bifunctional catalysts                                                  | HER $\eta_{10}$ (mV) | HER $\eta_{100}$ (mV) | HER $\eta_{200}$ (mV) | HER Tafel (dec <sup>-1</sup> ) | OER $\eta_{10}$ (mV) | OER $\eta_{100}$ (mV) | OER $\eta_{200}$ (mV) | OER Tafel (dec <sup>-1</sup> ) | Electrolyte            | Support                  | Mass loading (mg cm <sup>-2</sup> ) | Reference                                   |
|-------------------------------------------------------------------------|----------------------|-----------------------|-----------------------|--------------------------------|----------------------|-----------------------|-----------------------|--------------------------------|------------------------|--------------------------|-------------------------------------|---------------------------------------------|
| NiMoFe@MoO <sub>2</sub> -2#                                             | 28                   | 67                    | 87                    | 33                             | 224                  | 275                   | 295                   | 64                             | 1 M KOH                | Ni foam                  | 39                                  | This work                                   |
| NiMoFe@MoO <sub>2</sub> -4#                                             | 28                   | 83                    | 120                   | 40                             | 211                  | 242                   | 252                   | 37                             | 1 M KOH                | Ni foam                  | 37                                  | This work                                   |
| NiMoFe@MoO <sub>2</sub> -5#                                             | 45                   | 115                   | 155                   | 43                             | 205                  | 239                   | 249                   | 35                             | 1 M KOH                | Ni foam                  | 35                                  | This work                                   |
| Ru-MnFeP                                                                | 35                   | ~70                   | -                     | 36                             | 191                  | ~280                  | ~300                  | 69                             | 1 M KOH                | Ni foam                  | NA                                  | Adv. Energy Mater. 2020, 10, 2000814        |
| Mo-Co <sub>9</sub> S <sub>8</sub> @C                                    | 113                  | ~310                  | -                     | 67.6                           | 200                  | 470                   | -                     | 95.6                           | 1 M KOH                | Carbon paper             | 1.0                                 | Adv. Energy Mater. 2020, 10, 1903137.       |
| Co-NC/CF                                                                | 157                  | ~270                  | ~300                  | 109                            | 246                  | ~330                  | ~350                  | 72                             | 1 M KOH                | Carbon fiber paper (CFP) | 1.1                                 | Energy Environ. Sci., 2020, 13, 545-553     |
| (Ni <sub>x</sub> Fe <sub>y</sub> Co <sub>6-x-y</sub> )Mo <sub>6</sub> C | 20                   | ~90                   | ~130                  | 47.4                           | 212                  | ~260                  | ~280                  | 55.1                           | 1 M KOH                | Ni foam                  | NA                                  | Appl. Catal. B, 290 (2021) 120049           |
| CoFeO@BP                                                                | 88                   | 250                   | -                     | 51                             | 266                  | ~330                  | ~390                  | 53                             | 1 M KOH                | Black phosphorus         | NA                                  | Angew. Chem. Int. Ed. 2020, 59, 21106-21113 |
| Fe-Ni <sub>5</sub> P <sub>4</sub> /NiFeOH                               | 197                  | 360 ( $\eta_{80}$ )   | -                     | 94                             | 221                  | ~330 ( $\eta_{80}$ )  | -                     | 35                             | 1 M KOH                | Ni foam                  | NA                                  | Appl. Catal. B, 291 (2021) 119987           |
| MoO <sub>3</sub> /Ni-NiO                                                | 62                   | ~260                  | -                     | 59                             | -                    | 347                   | -                     | 60                             | 1 M KOH                | carbon cloth             | NA                                  | Adv. Mater. 2020, 32, 2003414               |
| Ni <sub>2</sub> P-Fe <sub>2</sub> P                                     | 128                  | 225                   | ~250                  | 86                             | -                    | 261                   | ~280                  | 58                             | 1 M KOH                | Ni foam                  | 15.0                                | Adv.Funct.Mater. 2021, 31, 2006484.         |
| Cr-doped FeNi-P/NCN                                                     | 190                  | 250 ( $\eta_{70}$ )   | -                     | 68.5                           | 240                  | ~350 ( $\eta_{80}$ )  | -                     | 72.3                           | 1 M KOH                | Ni foam                  | 3.0                                 | Adv.Mater. 2019, 31, 1900178.               |
| FeP/Ni <sub>2</sub> P                                                   | 14                   | ~140                  | -                     | 24.2                           | 154                  | ~230                  | -                     | 22.7                           | 1 M KOH                | Ni foam                  | 8                                   | Nat Commun 9, 2551 (2018)                   |
| NiMoO <sub>x</sub> /NiMoS                                               | 38                   | 89                    | ~120                  | 38                             | 186                  | 225                   | ~240                  | 34                             | 1 M KOH                | Ni foam                  | NA                                  | Nat Commun 11, 5462 (2020).                 |
| Co <sub>3</sub> Mo/Cu                                                   | 12                   | ~70                   | ~80                   | 40                             | -                    | ~330                  | ~360                  | 40                             | 1 M KOH and 0.5 M NaCl | Ni foam                  | NA                                  | Nat Commun 11, 2940 (2020).                 |
| Ni-P-B                                                                  | -                    | ~130                  | -                     | 42.1                           | -                    | ~260                  | -                     | -                              | 1 M KOH                | Ni foam                  | 5.63                                | Energy Environ. Sci., 2020, 13, 102         |
| Ni/Ni(OH) <sub>2</sub>                                                  | 77                   | ~120                  | -                     | 53                             | 270                  | ~340                  | -                     | 70                             | 1 M KOH                | Carbon papers            | 0.5                                 | Adv. Mater. 2020, 32, 1906915               |
| Ir-NSG                                                                  | ~18.5                | ~55 ( $\eta_{30}$ )   | -                     | 28.3                           | ~256                 | ~290 ( $\eta_{30}$ )  | -                     | 40                             | 1 M KOH                | Carbon fiber paper (CFP) | 0.073                               | Nat Commun 11, 4246 (2020).                 |
| RuTe <sub>2</sub>                                                       | 34                   | 70 ( $\eta_{40}$ )    | -                     | 28                             | 275                  | ~390 ( $\eta_{50}$ )  | -                     | 53                             | 1 M KOH                | Glassy carbon electrode  | NA                                  | Appl. Catal. B, 278 (2020) 119281           |
| Ir-C≡                                                                   | 7                    | 80 ( $\eta_{40}$ )    | -                     | 62                             | 300                  | ~340 ( $\eta_{40}$ )  | -                     | 37                             | 1 M KOH                | Glassy carbon electrode  | 40 $\mu$ gIr                        | ACS Catal. 2021, 11, 1179-1188              |
| H-Fe-CoMoS                                                              | 137                  | ~290                  | -                     | 98                             | 282                  | ~350                  | -                     | 58                             | 1 M KOH                | Carbon paper             | NA                                  | Nano Energy, 2020, 75, 104913               |
| NiFeMo                                                                  | 45                   | 150                   | 200                   | -                              | 238                  | 290                   | 310                   | 35                             | 1 M KOH                | Ni foam                  | NA                                  | ACS Energy Lett. 2018, 3, 546-554           |

---

|             |     |     |   |      |   |     |   |      |         |         |      |                                                        |
|-------------|-----|-----|---|------|---|-----|---|------|---------|---------|------|--------------------------------------------------------|
| NiCo-9AC-AD | 143 | 232 | - | 79.5 | - | 350 | - | 51.3 | 1 M KOH | Ni foam | 10.2 | ACS Sustainable Chem. Eng.<br>2019, 7, 21, 18085–18092 |
|-------------|-----|-----|---|------|---|-----|---|------|---------|---------|------|--------------------------------------------------------|

---

**Table S4.** Full alkaline water splitting performance comparisons among recently reported advanced electrocatalysts (including the non-noble and noble bifunctional catalysts as well as cell couples combined different OER and HER catalysts). V<sub>10</sub>, V<sub>100</sub>, V<sub>200</sub>, V<sub>500</sub> and V<sub>1000</sub> correspond to the cell voltages at the geometric current densities of 10, 100, 200, 500 and 1000 mA cm<sup>-2</sup>, respectively.

| Bifunctional catalysts                                                                         | V <sub>10</sub> | V <sub>100</sub> | V <sub>200</sub> | V <sub>500</sub> | V <sub>1000</sub> | Water splitting stability                                       | Electrolyte            | Support                 | Mass loading (mg cm <sup>-2</sup> ) | Reference                                   |
|------------------------------------------------------------------------------------------------|-----------------|------------------|------------------|------------------|-------------------|-----------------------------------------------------------------|------------------------|-------------------------|-------------------------------------|---------------------------------------------|
| NiMoFe@MoO <sub>2</sub> -4#                                                                    | 1.46            | 1.52             | 1.56             | 1.61             | 1.66              | 1000 h@100 mA cm <sup>-2</sup><br>500 h@200 mA cm <sup>-2</sup> | 1 M KOH                | Ni foam                 | 37                                  | This work                                   |
| Ir-NSG                                                                                         | 1.45            | ~1.57            | ~1.62            | ~2.15            | ~2.3              | 24 h@10 mA cm <sup>-2</sup>                                     | 1 M KOH                | Carbon fiber paper      | 0.073                               | Nat Commun 11, 4246 (2020).                 |
| FeP/Ni <sub>2</sub> P                                                                          | 1.42            | ~1.6             | /                | 1.72             | /                 | 40 h@500 mA cm <sup>-2</sup>                                    | 1 M KOH                | Ni foam                 | 8                                   | Nat Commun 9, 2551 (2018)                   |
| NiMoO <sub>x</sub> /NiMoS                                                                      | 1.46            | 1.62             | ~1.67            | 1.75             | 1.82              | 500 h@500 mA cm <sup>-2</sup>                                   | 1 M KOH                | Ni foam                 | NA                                  | Nat Commun 11, 5462 (2020).                 |
| Co <sub>3</sub> Mo/Cu                                                                          | /               | 1.62             | ~1.67            | /                | /                 | 30 h@145 mA cm <sup>-2</sup>                                    | 1 M KOH and 0.5 M NaCl | Ni foam                 | NA                                  | Nat Commun 11, 2940 (2020).                 |
| Graphene/MoS <sub>2</sub> /FeCoNi(OH) <sub>x</sub> (+)//Graphene/MoS <sub>2</sub> /FeCoNiPx(-) | /               | 1.59             | 1.65             | 1.76             | /                 | 100 h@100 mA cm <sup>-2</sup><br>100 h@50 mA cm <sup>-2</sup>   | 1 M KOH                | Carbon fiber            | 6.7<br>5.9                          | Nat Commun 12, 1380 (2021).                 |
| MoO <sub>3</sub> /Ni-NiO                                                                       | 1.55            | ~1.78 (η80)      | /                | /                | /                 | 20 h@10 mA cm <sup>-2</sup>                                     | 1 M KOH                | Carbon cloth            | NA                                  | Adv. Mater. 2020, 32, 2003414               |
| Cr-doped FeNi-P/NCN                                                                            | 1.50            | ~1.69            | /                | /                | /                 | 20 h@10 mA cm <sup>-2</sup>                                     | 1 M KOH                | Ni foam                 | 3.0                                 | Adv. Mater. 2019, 31, 1900178.              |
| Ni/Ni(OH) <sub>2</sub>                                                                         | 1.59            | 1.70 (η60)       | /                | /                | /                 | 20 h@10 mA cm <sup>-2</sup>                                     | 1 M KOH                | Carbon papers           | 0.5                                 | Adv. Mater. 2020, 32, 1906915               |
| Ni-P-B                                                                                         | /               | 1.68             | 1.72             | /                | /                 | 240 h@1000 mA cm <sup>-2</sup>                                  | 1 M KOH                | Ni foam                 | 5.63                                | Energy Environ. Sci., 2020, 13, 102         |
| Ni nanowire array(-)//Ni <sub>0.8</sub> Fe <sub>0.2</sub> -AHNA(+)                             | 1.41            | 1.545            | ~1.61            | 1.702            | 1.76              | 24 h@500 mA cm <sup>-2</sup>                                    | 1 M KOH                | Ni foam                 | 2.5                                 | Energy Environ. Sci., 2020, 13, 86-95       |
| Co-NC/CF                                                                                       | 1.65            | 1.86             | ~1.9             | /                | /                 | 100 h@20 mA cm <sup>-2</sup>                                    | 1 M KOH                | Carbon fiber paper      | 1.1                                 | Energy Environ. Sci., 2020, 13, 545-553     |
| CoFeO@BP                                                                                       | 1.58            | ~1.77            | ~1.82            | /                | /                 | 24 h@10 mA cm <sup>-2</sup>                                     | 1 M KOH                | Black phosphorus        | NA                                  | Angew. Chem. Int. Ed. 2020, 59, 21106-21113 |
| Ru-MnFeP                                                                                       | 1.47            | ~1.62            | ~1.72            | /                | /                 | 50 h@20 mA cm <sup>-2</sup>                                     | 1 M KOH                | Ni foam                 | NA                                  | Adv. Energy Mater. 2020, 10, 2000814        |
| Mo-Co <sub>9</sub> S <sub>8</sub> @C                                                           | 1.56            | 1.96 (η50)       | /                | /                | /                 | 72 h@10 mA cm <sup>-2</sup>                                     | 1 M KOH                | Carbon paper            | 1.0                                 | Adv. Energy Mater. 2020, 10, 1903137.       |
| Ir-C≡                                                                                          | 1.50            | ~1.57            | /                | /                | /                 | 20 h@10 mA cm <sup>-2</sup>                                     | 1 M KOH                | Glassy carbon electrode | 40 μgIr                             | ACS Catal. 2021, 11, 1179-1188              |
| Ni <sub>2</sub> P-Fe <sub>2</sub> P                                                            | /               | 1.682            | ~1.74            | 1.865            | ~1.95             | 48 h@100 mA cm <sup>-2</sup><br>42 h@500 mA cm <sup>-2</sup>    | 1 M KOH                | Ni foam                 | 15.0                                | Adv. Funct. Mater. 2021, 31, 2006484.       |
| RuTe <sub>2</sub>                                                                              | 1.57            | ~2.0             | /                | /                | /                 | 20 h@10 mA cm <sup>-2</sup>                                     | 1 M KOH                | Glassy carbon electrode | NA                                  | Appl. Catal. B, 278 (2020) 119281           |



|                                                                         |      |            |      |      |       |                              |         |               |      |                                                     |
|-------------------------------------------------------------------------|------|------------|------|------|-------|------------------------------|---------|---------------|------|-----------------------------------------------------|
| (Ni <sub>x</sub> Fe <sub>y</sub> Co <sub>6-x-y</sub> )Mo <sub>6</sub> C | 1.47 | ~1.60      | 1.69 | 1.77 | ~1.86 | 50 h@500 mA cm <sup>-2</sup> | 1 M KOH | Ni foam       | NA   | Appl. Catal. B 290 (2021) 120049                    |
| Fe-Ni <sub>3</sub> P <sub>4</sub> /NiFeOH                               | 1.55 | ~1.56      | /    | /    | /     | 20 h@10 mA cm <sup>-2</sup>  | 1 M KOH | Ni foam       | NA   | Appl. Catal. B 291 (2021) 119987                    |
| H-Fe-CoMoS                                                              | 1.50 | 1.80 (η80) | /    | /    | □     | 10 h@20 mA cm <sup>-2</sup>  | 1 M KOH | Carbon papers | NA   | Nano Energy, 2020, 75, 104913                       |
| NiFeMo                                                                  | 1.45 | 1.82       | /    | /    | /     | 50 h@25 mA cm <sup>-2</sup>  | 1 M KOH | Ni foam       | NA   | ACS Energy Lett. 2018, 3, 546-554                   |
| NiCo-9AC-AD                                                             | 1.56 | ~1.71      | /    | /    | /     | 30 h@10 mA cm <sup>-2</sup>  | 1 M KOH | Ni foam       | 10.2 | ACS Sustainable Chem. Eng. 2019, 7, 21, 18085–18092 |

\* Note: The blue-marked two cell couples combined different OER and HER catalysts as the anode and cathode. Part of the data shown in the table was measured from the graph in the references and marked by the symbol of “~”.

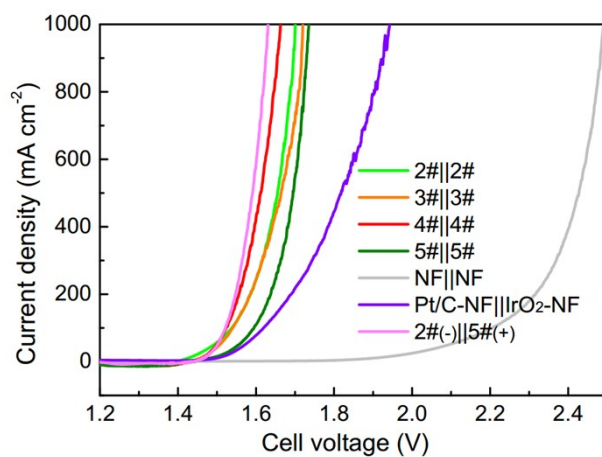

**Figure S18.** Full water splitting polarization curves of NiMoFe NPs@MoO<sub>2</sub> NPAs with different compositions and pure nickel foam as electrodes, and commercial Pt/C and IrO<sub>2</sub> on NF recorded in 1 M KOH (iR-corrected).

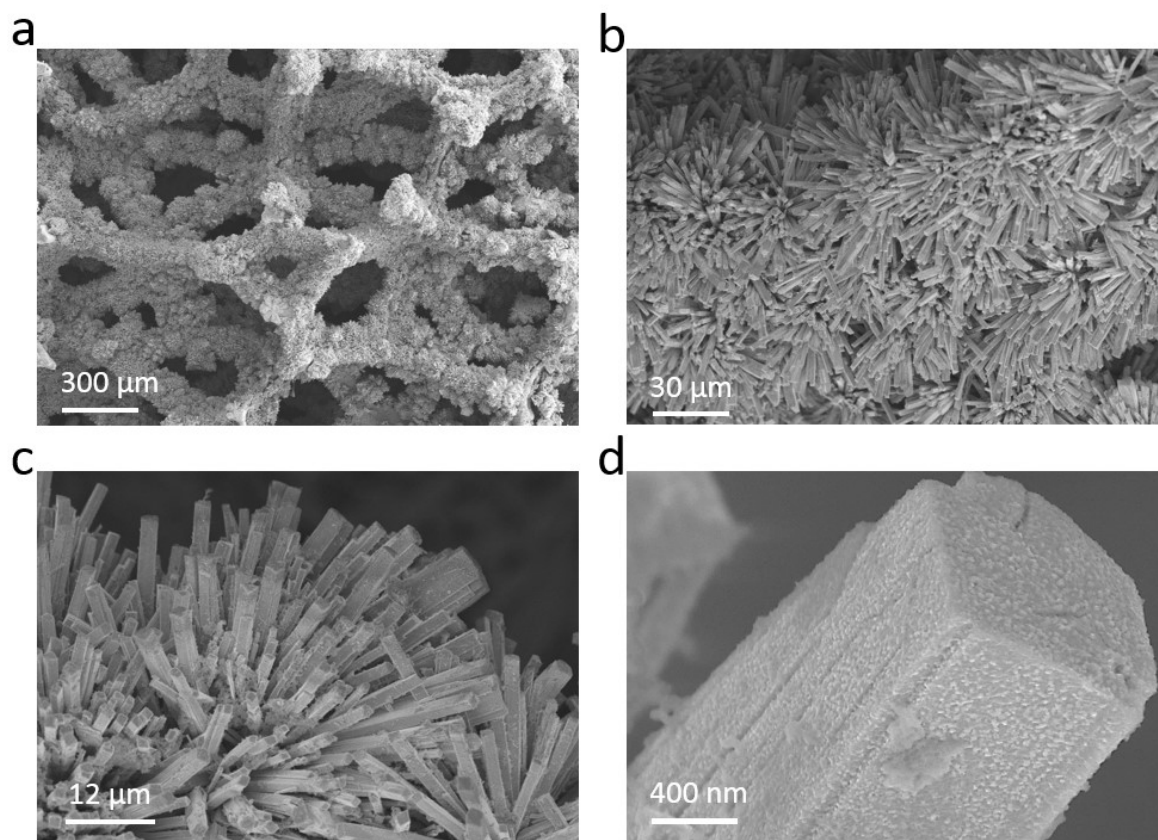

**Figure S19.** (a-d) SEM images of 4#-NiMoFe NPs@MoO<sub>2</sub> NPAs after 1048-h water splitting test at 10, 100 and 10 mA cm<sup>-2</sup> as the cathode in 1.0 M KOH solution at room temperature.

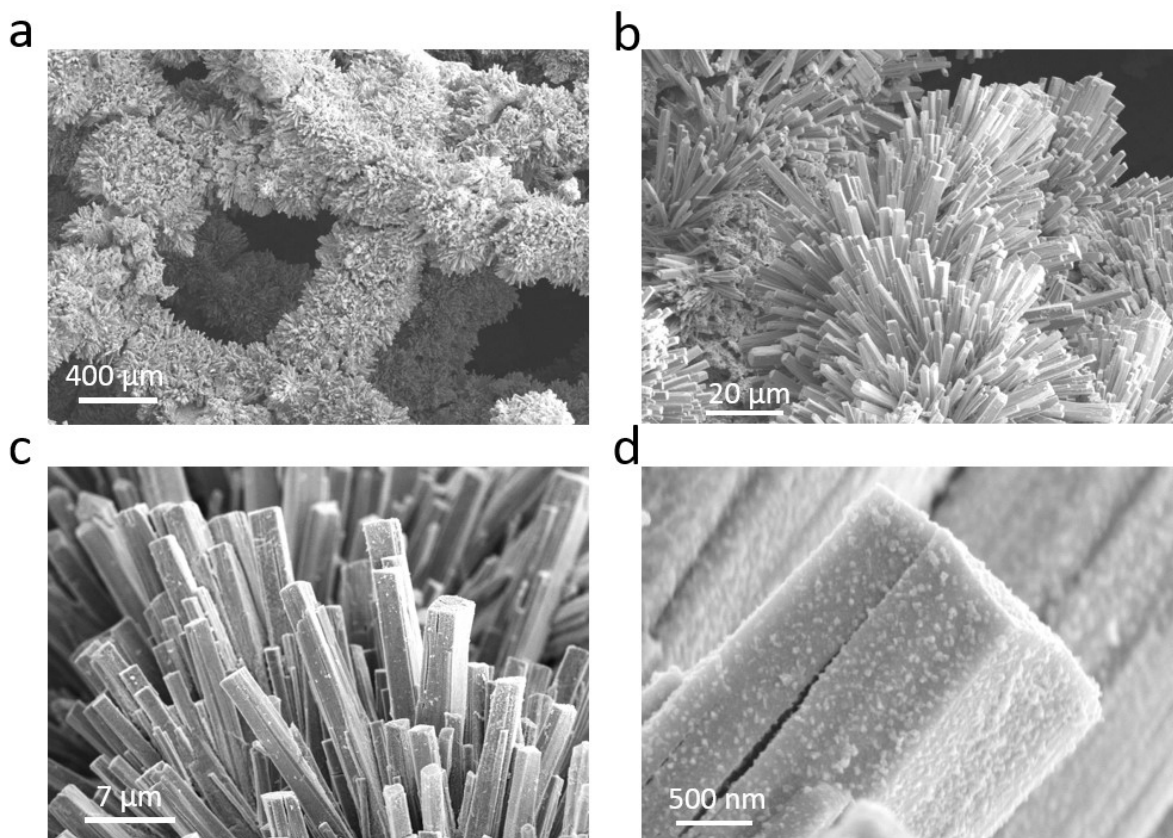

**Figure S20.** (a-d) SEM images of 4#-NiMoFe NPs@MoO<sub>2</sub> NPAs after 1048-h water splitting test at 10, 100 and 10 mA cm<sup>-2</sup> as the anode in 1.0 M KOH solution at room temperature.

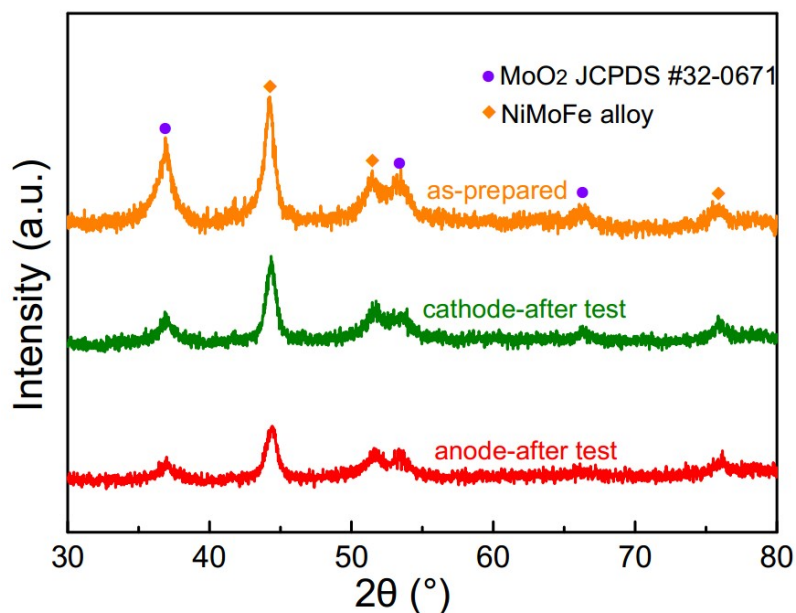

**Figure S21.** XRD patterns of the 4#-NiMoFe NPs@MoO<sub>2</sub> NPAs-NF before and after 1048-h water splitting test at 10, 100 and 10 mA cm<sup>-2</sup> as a bifunctional catalyst in 1.0 M KOH solution at room temperature.

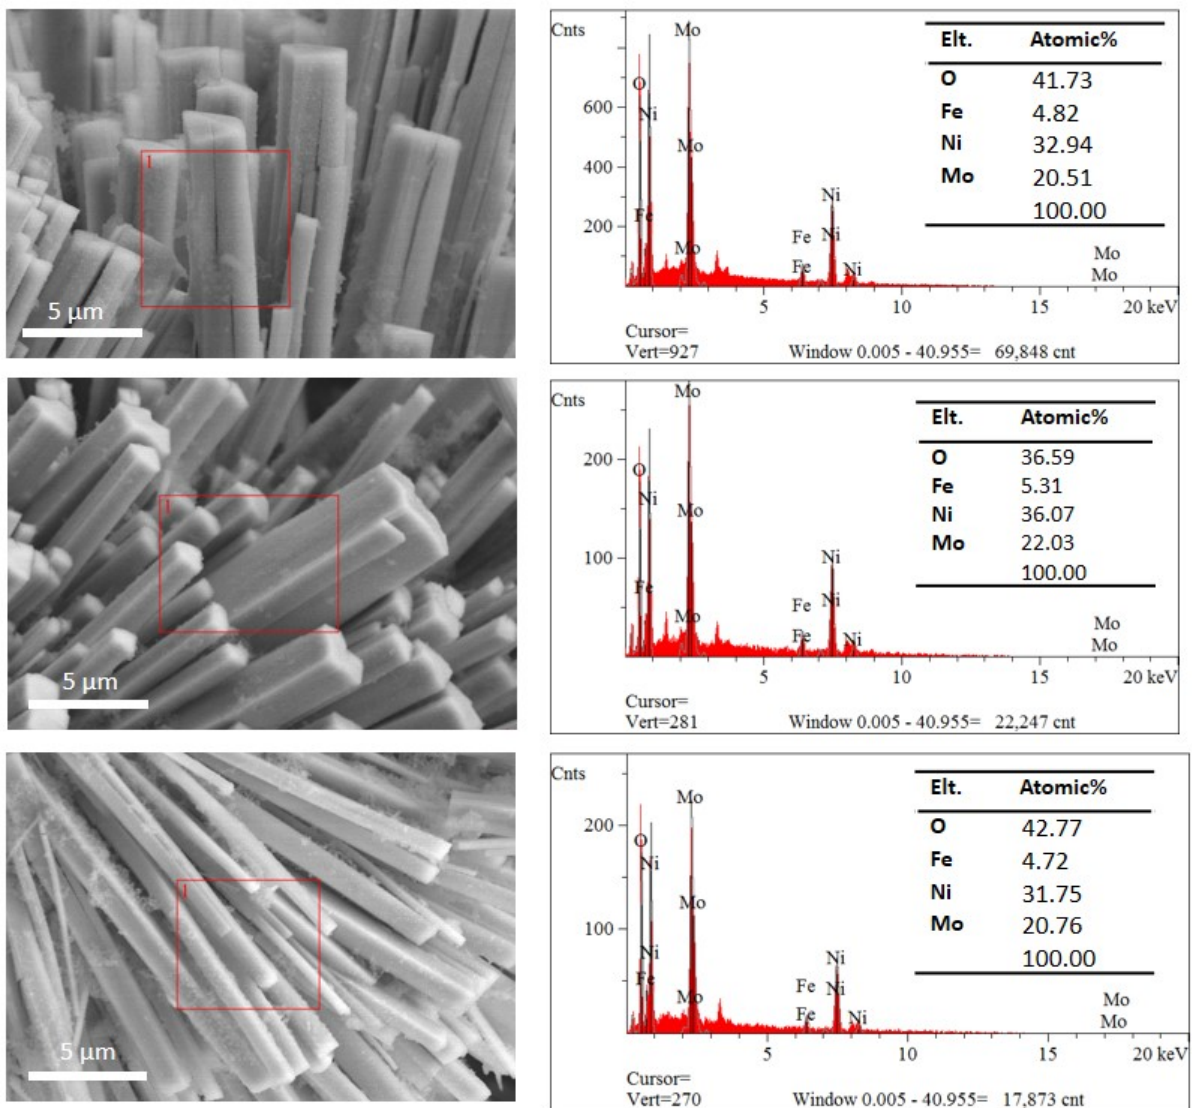

**Figure S22.** SEM images and corresponding EDS analysis of 4#-NiMoFe NPs@MoO<sub>2</sub> NPAs after 1048-h water splitting test at 10, 100 and 10 mA cm<sup>-2</sup> as the cathode in 1.0 M KOH solution at room temperature.



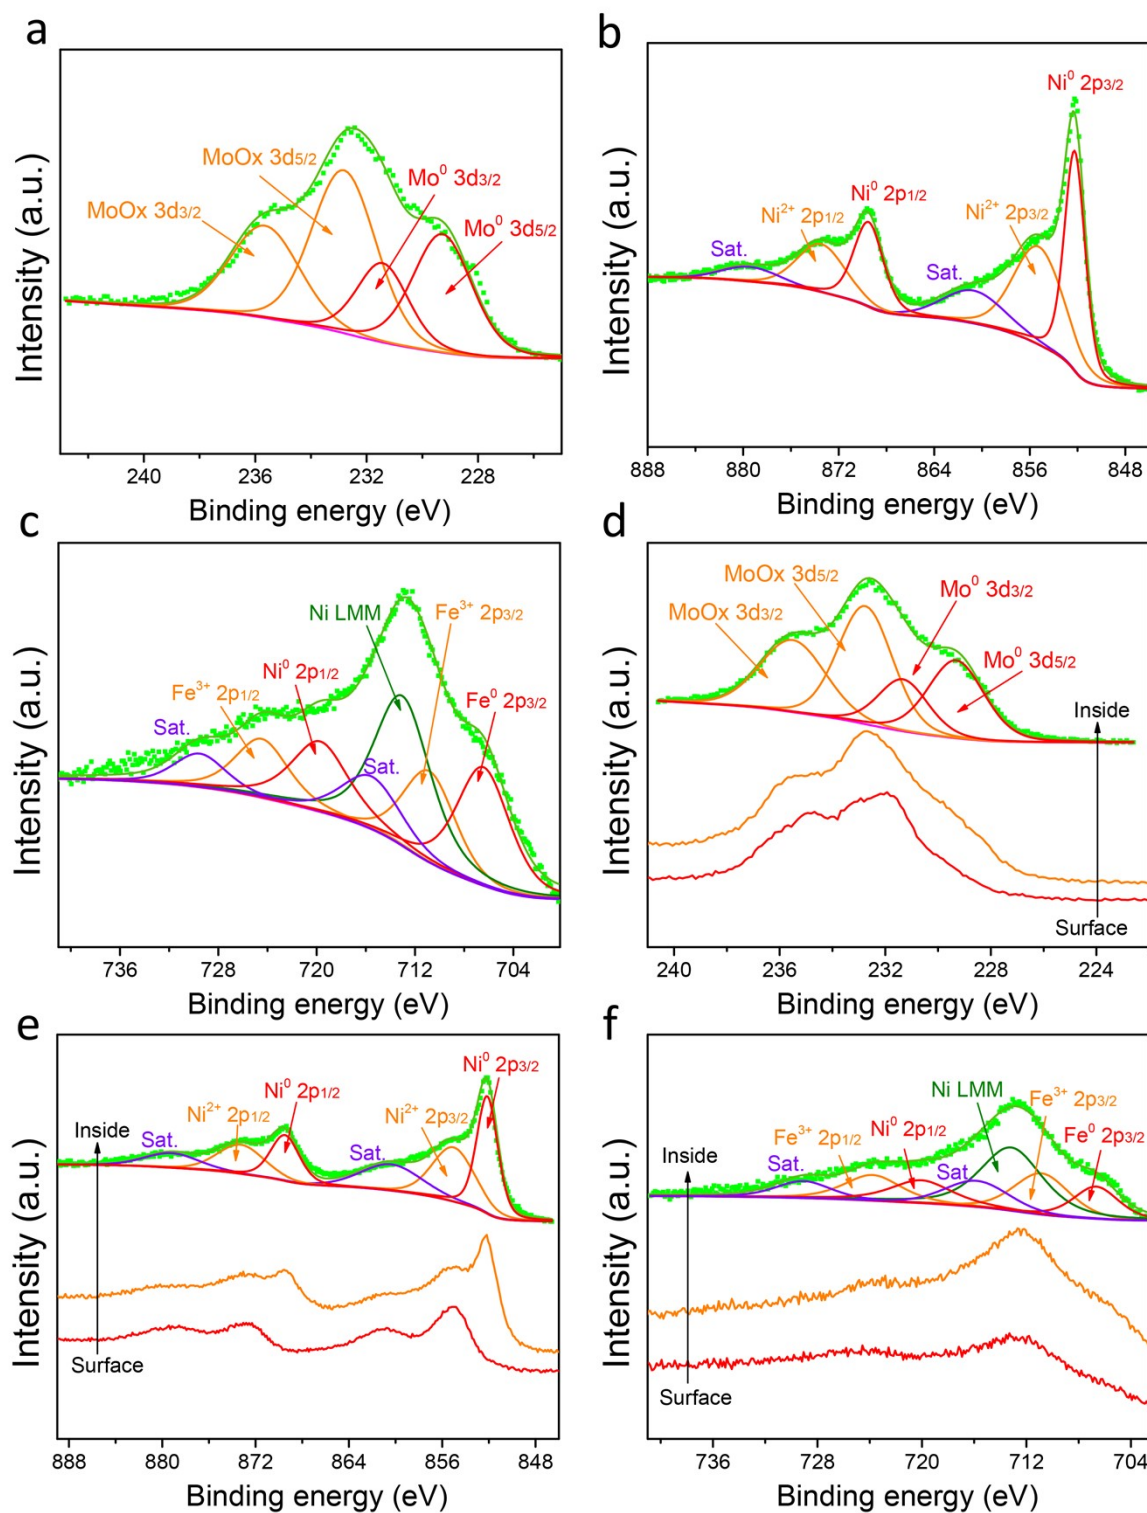

**Figure S23.** High-resolution XPS spectra of Mo 3d (a), Ni 2p (b), and Fe 2p (c) for 4# NiMoFe NPs@MoO<sub>2</sub> NPAs as anode after 1024-h test with 3-min argon ion bombardment (15 nm). High-resolution XPS spectra (depth profile) of Mo 3d (d), Ni 2p (e), and Fe 2p (f) for 4# NiMoFe NPs@MoO<sub>2</sub> NPAs after 1-hour 10-mA cm<sup>-2</sup> OER test with 0, 1.5, 3-min argon ion bombardment (surface, 8 nm, 15 nm).

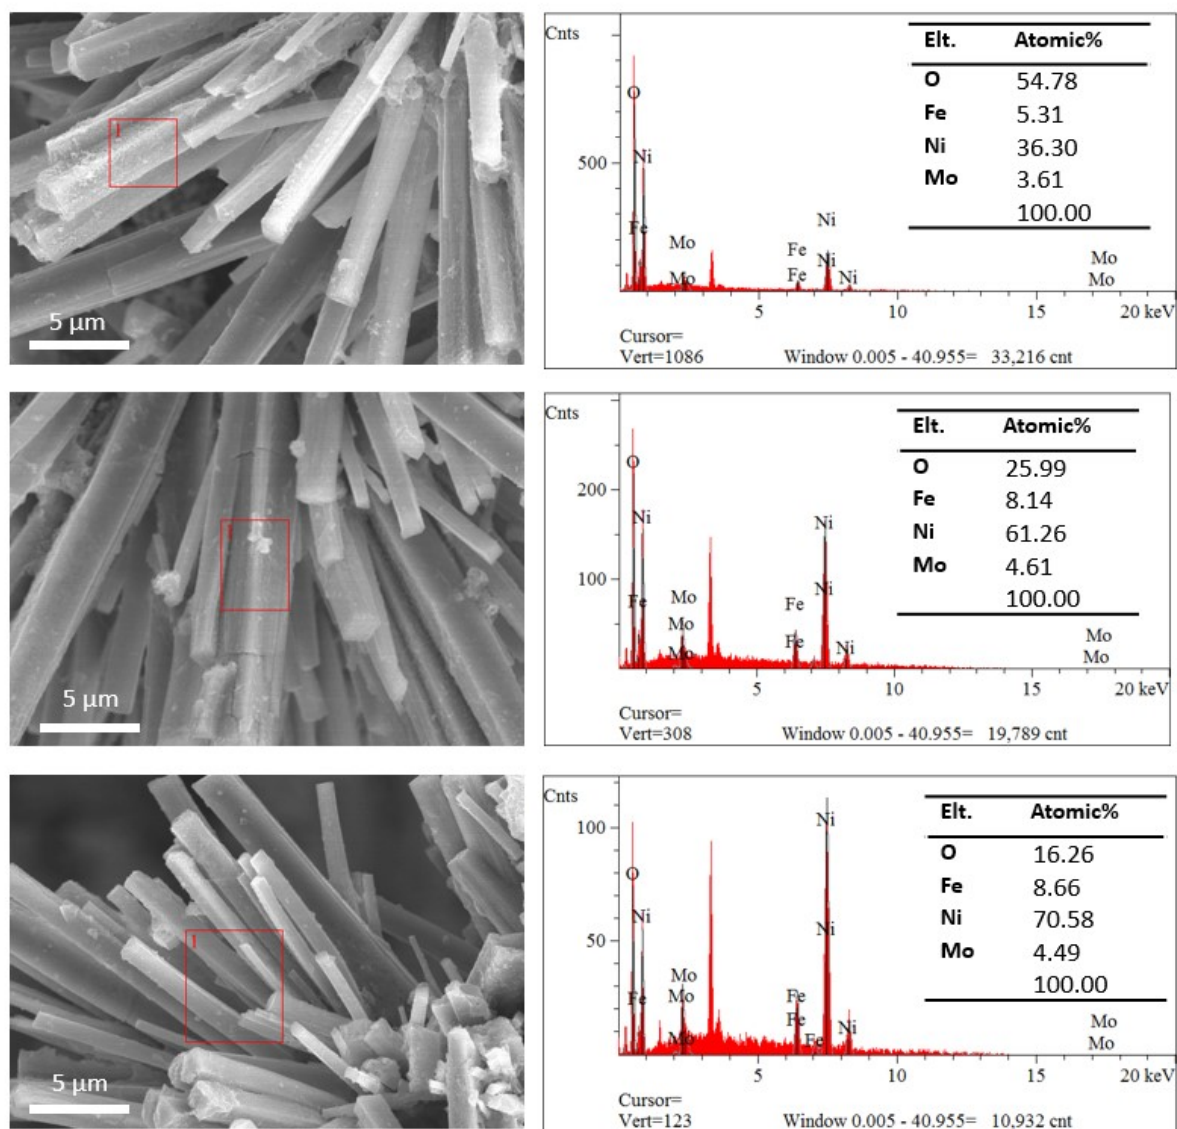

**Figure S24.** (a-c) SEM images and corresponding EDS analysis of 4#-NiMoFe NPs@MoO<sub>2</sub> NPAs after 1048-h water splitting test at 10, 100 and 10 mA cm<sup>-2</sup> as the anode in 1.0 M KOH solution at room temperature.

**Table S5.** Summary of SEM EDS results of 4# NiMoFe NPs@MoO<sub>2</sub> NPAs from Figure S3, S20 and S21.

| Elements | as-prepared (at %) | after testing-cathode (at %) | after testing-anode (at %) |
|----------|--------------------|------------------------------|----------------------------|
| O        | 37.7               | 40.4                         | 32.3                       |
| Fe       | 3.0                | 5.0                          | 7.4                        |
| Ni       | 25.5               | 33.6                         | 56.0                       |
| Mo       | 33.8               | 21.1                         | 4.2                        |



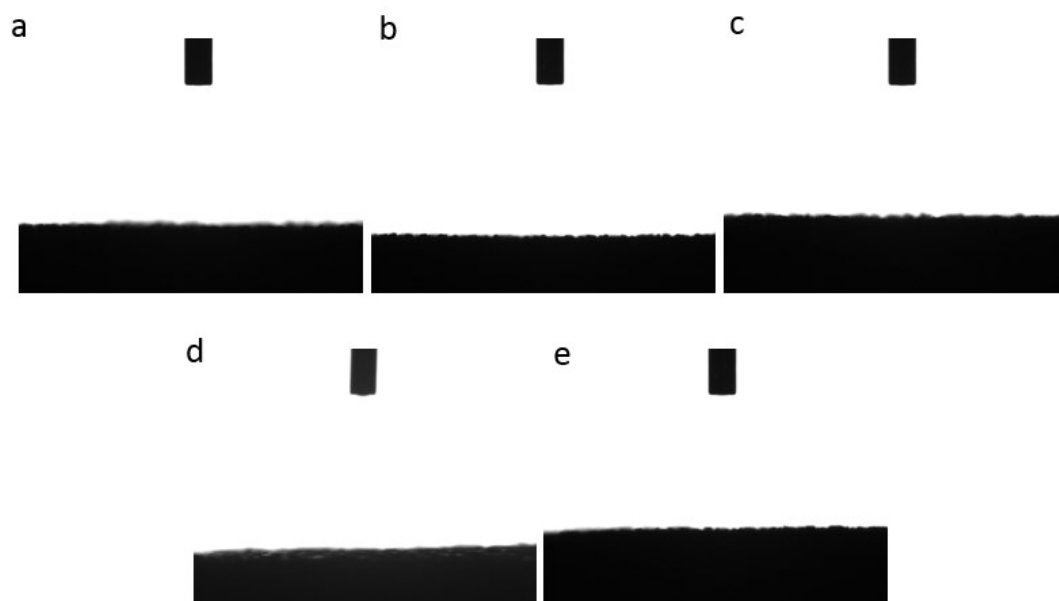

**Figure S25.** Optical images showing the static water contact angles ( $\theta$ ) of 1-5# NiMo(Fe) NPs @MoO<sub>2</sub> NPAs (a-e).

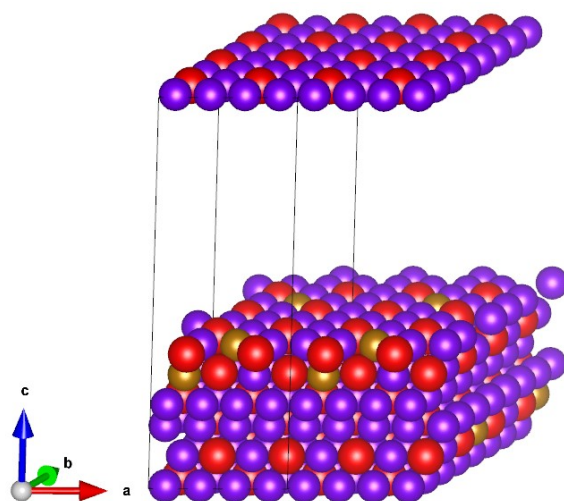

**Figure S26.** Schematic of the NiMoFe model. The supercell is marked by the black box (purple: Ni; gold: Fe; red: Mo).

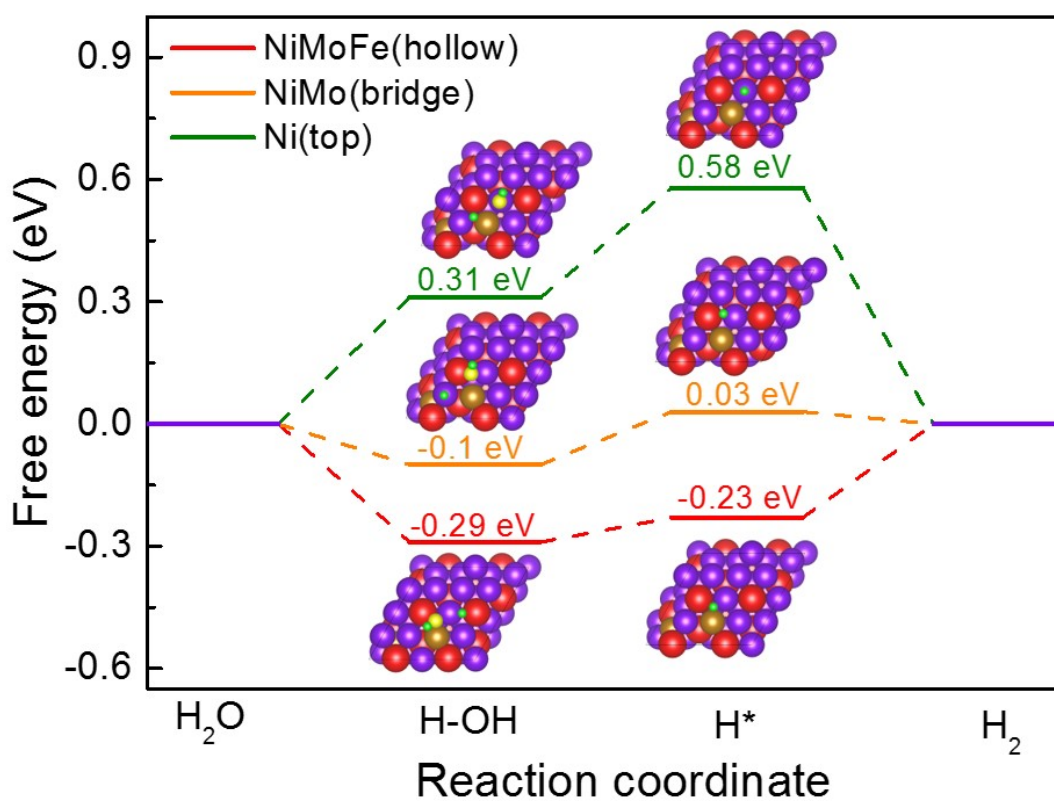

**Figure S27.** The free energy diagram for alkaline HER on different reaction sites of NiMoFe alloy. The adsorption sites of the intermediates OH-H and H\* are shown in the inset. (purple: Ni; gold: Fe; red: Mo; green: H; yellow: O).

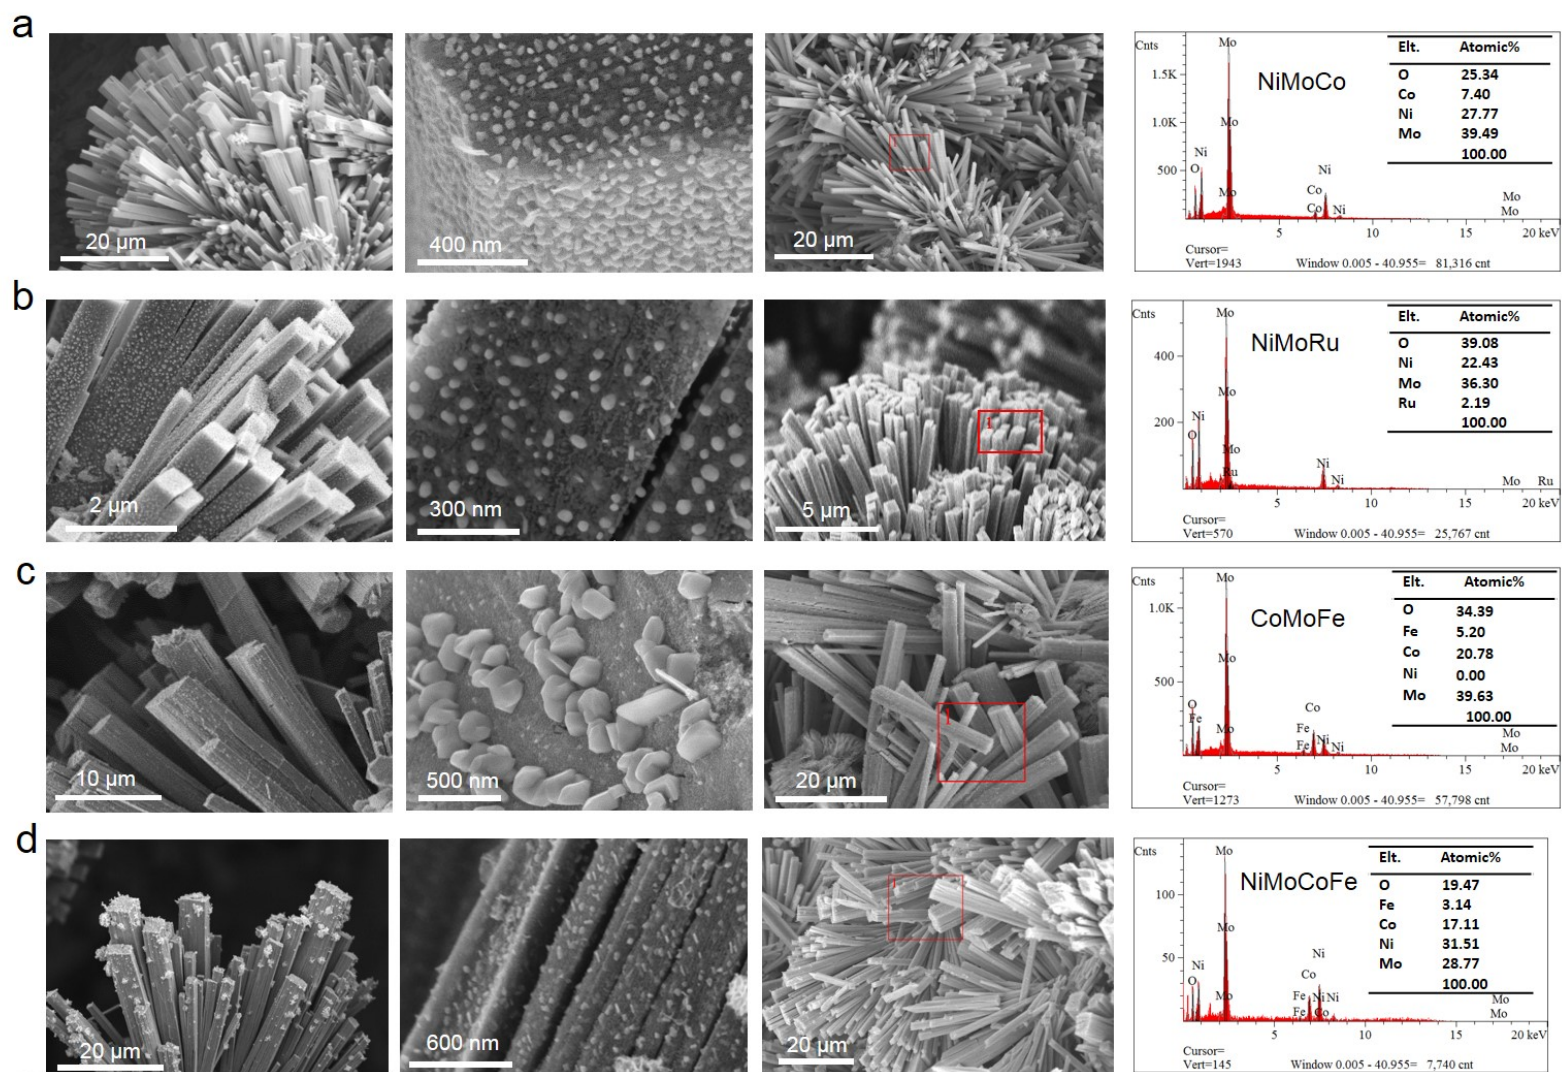

**Figure S28.** SEM images and corresponding EDS analysis of (a) NiMoCo, (b) NiMoRu, (c) CoMoFe and (d) NiMoCoFe NPs@MoO<sub>2</sub> NPAs prepared by the reductive annealing-induced phase separation method.

References:

- [1] a) G. Kresse, J. Furthmüller, *Physical Review B* **1996**, 54, 11169; b) G. Kresse, J. Hafner, *Physical Review B* **1994**, 49, 14251.
- [2] P. E. Blöchl, *Physical Review B* **1994**, 50, 17953.
- [3] a) J. P. Perdew, K. Burke, M. Ernzerhof, *Physical Review Letters* **1996**, 77, 3865; b) Y. Zhang, W. Yang, *Physical Review Letters* **1998**, 80, 890;  
c) B. Hammer, L. B. Hansen, J. K. Nørskov, *Physical Review B* **1999**, 59, 7413.
- [4] H. J. Monkhorst, J. D. Pack, *Physical review B* **1976**, 13, 5188.
